# Supplementary material for: A hypoallergenic peptide mix containing T cell epitopes of the clinically relevant house dust mite allergens
Source: PubMed Central journal article supplement (PMC7078969; doi:10.1111/all.13956), 2019-10-03
Supplement: ALL-74-2461-s005.pdf [file ALL-74-2461-s005.pdf]

Table S3. IgE reactivity of HDM-allergic patients (PA), non-HDM-sensitized allergic patients (NDP) and non-allergic individuals (NA) to micro-arrayed allergens determined by ImmunoCAP ISAC technology.

| Patient no. PA1 |   |                   |      |            |      |                |      |
|-----------------|---|-------------------|------|------------|------|----------------|------|
| Act d 1         | 0 | Bla g 5           | 0    | V Der p 14 | 0    | Phl p 2        | 0    |
| Act d 2         | 0 | Bla g 7           | 0    | V Der p 15 | 0    | Phl p 4        | 0    |
| Act d 5         | 0 | Blo t 5           | 0    | V Der p 18 | 0    | Phl p 5        | 0    |
| Act d 8         | 0 | Bos d 4           | 0    | V Der p 21 | 0.64 | Phl p 6        | 0    |
| Aln g 1         | 0 | V Bos d 4         | 0    | V Der p 23 | 1.43 | Phl p 7        | 0    |
| Alt a 1         | 0 | Bos d 5           | 0    | V clone 16 | 0    | Phl p 11       | 0    |
| Alt a 6         | 0 | V Bos d 5         | 0    | Equ c 1    | 0    | Phl p 12       | 0    |
| Amb a 1         | 0 | Bos d Lactoferrin | 0    | Equ c 3    | 0    | V Pis v 3      | 0    |
| V Ana o 1       | 0 | Bos d 8           | 0    | Fag e 2    | 0    | Pla a 1        | 0    |
| Ana o 2         | 0 | V Bos d 8         | 0    | Fel d 1    | 1.89 | Pla a 2        | 0    |
| V Ana o 2       | 0 | aS1-casein        | 0    | Fel d 2    | 0    | Pla a 3        | 0    |
| V nAna o 2      | 0 | aS2-casein        | 0    | Fel d 4    | 0    | Pla l 1        | 0    |
| V Ana o 3       | 0 | b-casein          | 0    | Gad c 1    | 0    | Pol d 5        | 0    |
| Ani s 1         | 0 | K-casein          | 0    | Gal d 1    | 0    | Pru p 1        | 0    |
| Ani s 3         | 0 | Transferrin       | 0    | Gal d 2    | 0    | Pru p 3        | 0    |
| Api g 1         | 0 | Bos d 6           | 0    | Gal d 3    | 0    | V Pru du 3     | 0    |
| Api m 1         | 0 | V BSA             | 0    | Gal d 5    | 0    | V Pru du 4     | 0    |
| V Api m 1       | 0 | Can f 1           | 0    | Gly m 4    | 0    | V Pru du 6     | 0    |
| V Api m 2       | 0 | Can f 2           | 0    | Gly m 5    | 0    | V Pru du 6.01  | 0    |
| Api m 4         | 0 | Can f 3           | 0    | Gly m 6    | 0    | V Pru du 6.02  | 0    |
| V Api m 4       | 0 | V Can f 4         | 0    | Hev b 1    | 0    | Sal k 1        | 0    |
| Ara h 1         | 0 | Can f 5           | 0    | Hev b 3    | 0    | Ses i 1        | 0    |
| V Ara h 1       | 0 | V Can f 5         | 0    | Hev b 5    | 0    | Tri a 14       | 0    |
| Ara h 2         | 0 | V Can f 6         | 0    | Hev b 6.01 | 0    | Tri a 19.0101  | 0    |
| Ara h 3         | 0 | Che a 1           | 0    | Hev b 8    | 0    | Tri a aA_TI    | 0    |
| V Ara h 3       | 0 | Cla h 8           | 0    | Jug r 1    | 0    | V Tri a 36 191 | 0    |
| Ara h 6         | 0 | Cor a 1.0401      | 0    | Jug r 2    | 0.07 | V Tri a 36     | 0    |
| V Ara h 6       | 0 | Cor a 8           | 0    | Jug r 3    | 0    | V m43          | 0    |
| Ara h 8         | 0 | Cor a 9           | 0    | Lep d 2    | 0    | V m82          | 0    |
| Ara h 9         | 0 | Cry j 1           | 0    | Mal d 1    | 0    | Serine         | 0    |
| Art v 1         | 0 | Cyn d 1           | 0.09 | Mer a 1    | 0    | Thioredoxin    | 0    |
| Art v 3         | 0 | Cup a 1           | 0    | Mus m 1    | 0    | Glutathione    | 0    |
| Asp f 1         | 0 | Der f 1           | 1.34 | MUXF3      | 0    | peroxiredoxin  | 0    |
| Asp f 3         | 0 | Der f 2           | 7.12 | Ole e 1    | 0    | Profilin       | 0    |
| Asp f 6         | 0 | Der p 1           | 2.38 | Ole e 7    | 0    | Dehydrin       | 0    |
| Ber e 1         | 0 | Der p 2           | 6.47 | Ole e 9    | 0    | purothionin    | 0    |
| Bet v 1         | 0 | V Der p 4         | 0    | Par j 2    | 0    | LTP            | 0    |
| Bet v 2         | 0 | V Der p 5         | 0    | Pen m 1    | 0    | V Ves v 1      | 0    |
| Bet v 4         | 0 | V Der p 7         | 0    | Pen m 2    | 0    | Ves v 5        | 0.08 |
| Bla g 1         | 0 | Der p 10          | 0.24 | Pen m 4    | 0    | V Ves v 5      | 0    |
| Bla g 2         | 0 | V Der p 11        | 0    | Phl p 1    | 0.44 | Blank          | 0    |

IgE levels are shown in ISAC Standardized Units (ISU), cut-off = 0.3 ISU.

| Patient no. PA2 |      |                   |      |            |      |                |      |
|-----------------|------|-------------------|------|------------|------|----------------|------|
| Act d 1         | 0    | Bla g 5           | 0    | V Der p 14 | 0    | Phl p 2        | 0    |
| Act d 2         | 0    | Bla g 7           | 0    | V Der p 15 | 0    | Phl p 4        | 0    |
| Act d 5         | 0    | Blo t 5           | 0    | V Der p 18 | 0    | Phl p 5        | 0    |
| Act d 8         | 0    | Bos d 4           | 0    | V Der p 21 | 0    | Phl p 6        | 0    |
| Aln g 1         | 0    | V Bos d 4         | 0    | V Der p 23 | 0.34 | Phl p 7        | 0    |
| Alt a 1         | 0    | Bos d 5           | 0    | V clone 16 | 0    | Phl p 11       | 0    |
| Alt a 6         | 0    | V Bos d 5         | 0    | Equ c 1    | 0    | Phl p 12       | 0    |
| Amb a 1         | 0    | Bos d Lactoferrin | 0    | Equ c 3    | 0    | V Pis v 3      | 0    |
| V Ana o 1       | 0    | Bos d 8           | 0    | Fag e 2    | 0    | Pla a 1        | 0    |
| Ana o 2         | 0    | V Bos d 8         | 0    | Fel d 1    | 0    | Pla a 2        | 0    |
| V Ana o 2       | 0    | aS1-casein        | 0    | Fel d 2    | 0    | Pla a 3        | 0    |
| V nAna o 2      | 0    | aS2-casein        | 0    | Fel d 4    | 0    | Pla l 1        | 0    |
| V Ana o 3       | 0    | b-casein          | 0    | Gad c 1    | 0    | Pol d 5        | 0    |
| Ani s 1         | 0    | K-casein          | 0    | Gal d 1    | 0    | Pru p 1        | 0    |
| Ani s 3         | 0    | Transferrin       | 0    | Gal d 2    | 0    | Pru p 3        | 0    |
| Api g 1         | 0    | Bos d 6           | 0    | Gal d 3    | 0    | V Pru du 3     | 0    |
| Api m 1         | 0    | V BSA             | 0    | Gal d 5    | 0    | V Pru du 4     | 0    |
| V Api m 1       | 0    | Can f 1           | 0    | Gly m 4    | 0    | V Pru du 6     | 0    |
| V Api m 2       | 0    | Can f 2           | 0    | Gly m 5    | 0    | V Pru du 6.01  | 0    |
| Api m 4         | 0    | Can f 3           | 0    | Gly m 6    | 0    | V Pru du 6.02  | 0    |
| V Api m 4       | 0    | V Can f 4         | 0    | Hev b 1    | 0    | Sal k 1        | 0    |
| Ara h 1         | 0    | Can f 5           | 0    | Hev b 3    | 0    | Ses i 1        | 0    |
| V Ara h 1       | 0    | V Can f 5         | 0    | Hev b 5    | 0    | Tri a 14       | 0    |
| Ara h 2         | 0    | V Can f 6         | 0    | Hev b 6.01 | 0    | Tri a 19.0101  | 0    |
| Ara h 3         | 0    | Che a 1           | 0    | Hev b 8    | 0    | Tri a aA_TI    | 0    |
| V Ara h 3       | 0    | Cla h 8           | 0    | Jug r 1    | 0    | V Tri a 36 191 | 0    |
| Ara h 6         | 0    | Cor a 1.0401      | 0    | Jug r 2    | 0    | V Tri a 36     | 0    |
| V Ara h 6       | 0    | Cor a 8           | 0    | Jug r 3    | 0    | V m43          | 0    |
| Ara h 8         | 0    | Cor a 9           | 0    | Lep d 2    | 0    | V m82          | 0    |
| Ara h 9         | 0    | Cry j 1           | 0    | Mal d 1    | 0.14 | Serine         | 0    |
| Art v 1         | 0    | Cyn d 1           | 0    | Mer a 1    | 0    | Thioredoxin    | 0    |
| Art v 3         | 0    | Cup a 1           | 0    | Mus m 1    | 0    | Glutathione    | 0    |
| Asp f 1         | 0    | Der f 1           | 0.86 | MUXF3      | 0    | peroxiredoxin  | 0    |
| Asp f 3         | 0    | Der f 2           | 0.18 | Ole e 1    | 0.08 | Profilin       | 0    |
| Asp f 6         | 0    | Der p 1           | 1.19 | Ole e 7    | 0    | Dehydrin       | 0    |
| Ber e 1         | 0    | Der p 2           | 0.26 | Ole e 9    | 0    | purothionin    | 0    |
| Bet v 1         | 0.25 | V Der p 4         | 0    | Par j 2    | 0    | LTP            | 0    |
| Bet v 2         | 0    | V Der p 5         | 1.31 | Pen m 1    | 0    | V Ves v 1      | 0    |
| Bet v 4         | 0    | V Der p 7         | 0    | Pen m 2    | 0    | Ves v 5        | 0.11 |
| Bla g 1         | 0    | Der p 10          | 0.14 | Pen m 4    | 0    | V Ves v 5      | 0    |
| Bla g 2         | 0    | V Der p 11        | 0    | Phl p 1    | 0    | Blank          | 0    |

| Patient no. PA3 |      |                   |       |            |      |                |      |
|-----------------|------|-------------------|-------|------------|------|----------------|------|
| Act d 1         | 0    | Bla g 5           | 0     | V Der p 14 | 0    | Phl p 2        | 0    |
| Act d 2         | 0    | Bla g 7           | 0     | V Der p 15 | 0    | Phl p 4        | 0    |
| Act d 5         | 0    | Blo t 5           | 0     | V Der p 18 | 0    | Phl p 5        | 0    |
| Act d 8         | 0    | Bos d 4           | 0     | V Der p 21 | 0    | Phl p 6        | 0    |
| Aln g 1         | 0    | V Bos d 4         | 0     | V Der p 23 | 0    | Phl p 7        | 0    |
| Alt a 1         | 0    | Bos d 5           | 0     | V clone 16 | 0    | Phl p 11       | 0    |
| Alt a 6         | 0    | V Bos d 5         | 0     | Equ c 1    | 0    | Phl p 12       | 0    |
| Amb a 1         | 0    | Bos d Lactoferrin | 0     | Equ c 3    | 0    | V Pis v 3      | 0    |
| V Ana o 1       | 0    | Bos d 8           | 0     | Fag e 2    | 0    | Pla a 1        | 0    |
| Ana o 2         | 0.27 | V Bos d 8         | 0     | Fel d 1    | 0.85 | Pla a 2        | 0    |
| V Ana o 2       | 0    | aS1-casein        | 0     | Fel d 2    | 0    | Pla a 3        | 0    |
| V nAna o 2      | 0    | aS2-casein        | 0     | Fel d 4    | 0    | Pla l 1        | 0    |
| V Ana o 3       | 0    | b-casein          | 0     | Gad c 1    | 0    | Pol d 5        | 0    |
| Ani s 1         | 0    | K-casein          | 0     | Gal d 1    | 0    | Pru p 1        | 0    |
| Ani s 3         | 0    | Transferrin       | 0     | Gal d 2    | 0    | Pru p 3        | 0    |
| Api g 1         | 0    | Bos d 6           | 0     | Gal d 3    | 0    | V Pru du 3     | 0    |
| Api m 1         | 0    | V BSA             | 0     | Gal d 5    | 0    | V Pru du 4     | 0    |
| V Api m 1       | 0    | Can f 1           | 0     | Gly m 4    | 0    | V Pru du 6     | 0    |
| V Api m 2       | 0    | Can f 2           | 0     | Gly m 5    | 0.28 | V Pru du 6.01  | 0    |
| Api m 4         | 0    | Can f 3           | 0     | Gly m 6    | 0    | V Pru du 6.02  | 0    |
| V Api m 4       | 0    | V Can f 4         | 0     | Hev b 1    | 0.34 | Sal k 1        | 0    |
| Ara h 1         | 0    | Can f 5           | 0     | Hev b 3    | 0    | Ses i 1        | 0    |
| V Ara h 1       | 0    | V Can f 5         | 0     | Hev b 5    | 0    | Tri a 14       | 0    |
| Ara h 2         | 0    | V Can f 6         | 0     | Hev b 6.01 | 0    | Tri a 19.0101  | 0.79 |
| Ara h 3         | 0    | Che a 1           | 0     | Hev b 8    | 0    | Tri a aA_TI    | 0    |
| V Ara h 3       | 0    | Cla h 8           | 0     | Jug r 1    | 0    | V Tri a 36 191 | 0    |
| Ara h 6         | 0    | Cor a 1.0401      | 0     | Jug r 2    | 0    | V Tri a 36     | 0    |
| V Ara h 6       | 0    | Cor a 8           | 0     | Jug r 3    | 0    | V m43          | 0    |
| Ara h 8         | 0    | Cor a 9           | 0     | Lep d 2    | 0    | V m82          | 0    |
| Ara h 9         | 0    | Cry j 1           | 0     | Mal d 1    | 0    | Serine         | 0    |
| Art v 1         | 0    | Cyn d 1           | 0     | Mer a 1    | 0    | Thioredoxin    | 0    |
| Art v 3         | 0    | Cup a 1           | 0     | Mus m 1    | 0    | Glutathione    | 0    |
| Asp f 1         | 0    | Der f 1           | 0     | MUXF3      | 0    | peroxiredoxin  | 0    |
| Asp f 3         | 0    | Der f 2           | 22.21 | Ole e 1    | 0    | Profilin       | 0    |
| Asp f 6         | 0    | Der p 1           | 0     | Ole e 7    | 0    | Dehydrin       | 0    |
| Ber e 1         | 0    | Der p 2           | 9.38  | Ole e 9    | 0    | purothionin    | 0    |
| Bet v 1         | 0    | V Der p 4         | 0     | Par j 2    | 0    | LTP            | 0    |
| Bet v 2         | 0    | V Der p 5         | 0     | Pen m 1    | 0    | V Ves v 1      | 0    |
| Bet v 4         | 0    | V Der p 7         | 0     | Pen m 2    | 0    | Ves v 5        | 0    |
| Bla g 1         | 0    | Der p 10          | 0     | Pen m 4    | 0    | V Ves v 5      | 0    |
| Bla g 2         | 0    | V Der p 11        | 0     | Phl p 1    | 0.46 | Blank          | 0    |

| Patient no. PA4 |   |                   |      |            |   |                |   |
|-----------------|---|-------------------|------|------------|---|----------------|---|
| Act d 1         | 0 | Bla g 5           | 0    | V Der p 14 | 0 | Phl p 2        | 0 |
| Act d 2         | 0 | Bla g 7           | 0    | V Der p 15 | 0 | Phl p 4        | 0 |
| Act d 5         | 0 | Blo t 5           | 0    | V Der p 18 | 0 | Phl p 5        | 0 |
| Act d 8         | 0 | Bos d 4           | 0    | V Der p 21 | 0 | Phl p 6        | 0 |
| Aln g 1         | 0 | V Bos d 4         | 0    | V Der p 23 | 0 | Phl p 7        | 0 |
| Alt a 1         | 0 | Bos d 5           | 0    | V clone 16 | 0 | Phl p 11       | 0 |
| Alt a 6         | 0 | V Bos d 5         | 0    | Equ c 1    | 0 | Phl p 12       | 0 |
| Amb a 1         | 0 | Bos d Lactoferrin | 0    | Equ c 3    | 0 | V Pis v 3      | 0 |
| V Ana o 1       | 0 | Bos d 8           | 0    | Fag e 2    | 0 | Pla a 1        | 0 |
| Ana o 2         | 0 | V Bos d 8         | 0    | Fel d 1    | 0 | Pla a 2        | 0 |
| V Ana o 2       | 0 | aS1-casein        | 0    | Fel d 2    | 0 | Pla a 3        | 0 |
| V nAna o 2      | 0 | aS2-casein        | 0    | Fel d 4    | 0 | Pla l 1        | 0 |
| V Ana o 3       | 0 | b-casein          | 0    | Gad c 1    | 0 | Pol d 5        | 0 |
| Ani s 1         | 0 | K-casein          | 0    | Gal d 1    | 0 | Pru p 1        | 0 |
| Ani s 3         | 0 | Transferrin       | 0    | Gal d 2    | 0 | Pru p 3        | 0 |
| Api g 1         | 0 | Bos d 6           | 0    | Gal d 3    | 0 | V Pru du 3     | 0 |
| Api m 1         | 0 | V BSA             | 0    | Gal d 5    | 0 | V Pru du 4     | 0 |
| V Api m 1       | 0 | Can f 1           | 0    | Gly m 4    | 0 | V Pru du 6     | 0 |
| V Api m 2       | 0 | Can f 2           | 0    | Gly m 5    | 0 | V Pru du 6.01  | 0 |
| Api m 4         | 0 | Can f 3           | 0    | Gly m 6    | 0 | V Pru du 6.02  | 0 |
| V Api m 4       | 0 | V Can f 4         | 0    | Hev b 1    | 0 | Sal k 1        | 0 |
| Ara h 1         | 0 | Can f 5           | 0    | Hev b 3    | 0 | Ses i 1        | 0 |
| V Ara h 1       | 0 | V Can f 5         | 0    | Hev b 5    | 0 | Tri a 14       | 0 |
| Ara h 2         | 0 | V Can f 6         | 0    | Hev b 6.01 | 0 | Tri a 19.0101  | 0 |
| Ara h 3         | 0 | Che a 1           | 0    | Hev b 8    | 0 | Tri a aA_TI    | 0 |
| V Ara h 3       | 0 | Cla h 8           | 0    | Jug r 1    | 0 | V Tri a 36 191 | 0 |
| Ara h 6         | 0 | Cor a 1.0401      | 0    | Jug r 2    | 0 | V Tri a 36     | 0 |
| V Ara h 6       | 0 | Cor a 8           | 0    | Jug r 3    | 0 | V m43          | 0 |
| Ara h 8         | 0 | Cor a 9           | 0    | Lep d 2    | 0 | V m82          | 0 |
| Ara h 9         | 0 | Cry j 1           | 0    | Mal d 1    | 0 | Serine         | 0 |
| Art v 1         | 0 | Cyn d 1           | 0    | Mer a 1    | 0 | Thioredoxin    | 0 |
| Art v 3         | 0 | Cup a 1           | 0    | Mus m 1    | 0 | Glutathione    | 0 |
| Asp f 1         | 0 | Der f 1           | 0.18 | MUXF3      | 0 | peroxiredoxin  | 0 |
| Asp f 3         | 0 | Der f 2           | 2.31 | Ole e 1    | 0 | Profilin       | 0 |
| Asp f 6         | 0 | Der p 1           | 0.29 | Ole e 7    | 0 | Dehydrin       | 0 |
| Ber e 1         | 0 | Der p 2           | 1.46 | Ole e 9    | 0 | purothionin    | 0 |
| Bet v 1         | 0 | V Der p 4         | 0    | Par j 2    | 0 | LTP            | 0 |
| Bet v 2         | 0 | V Der p 5         | 0    | Pen m 1    | 0 | V Ves v 1      | 0 |
| Bet v 4         | 0 | V Der p 7         | 0    | Pen m 2    | 0 | Ves v 5        | 0 |
| Bla g 1         | 0 | Der p 10          | 0    | Pen m 4    | 0 | V Ves v 5      | 0 |
| Bla g 2         | 0 | V Der p 11        | 0    | Phl p 1    | 0 | Blank          | 0 |

| Patient no. PA5 |      |                   |       |            |      |                |      |
|-----------------|------|-------------------|-------|------------|------|----------------|------|
| Act d 1         | 0    | Bla g 5           | 0     | V Der p 14 | 0    | Phl p 2        | 0    |
| Act d 2         | 0    | Bla g 7           | 0     | V Der p 15 | 0    | Phl p 4        | 0    |
| Act d 5         | 0    | Blo t 5           | 0     | V Der p 18 | 0    | Phl p 5        | 0.99 |
| Act d 8         | 0    | Bos d 4           | 0     | V Der p 21 | 0    | Phl p 6        | 0    |
| Aln g 1         | 0    | V Bos d 4         | 0     | V Der p 23 | 0    | Phl p 7        | 0    |
| Alt a 1         | 0.31 | Bos d 5           | 0     | V clone 16 | 0    | Phl p 11       | 0    |
| Alt a 6         | 0    | V Bos d 5         | 0     | Equ c 1    | 0    | Phl p 12       | 0    |
| Amb a 1         | 0    | Bos d Lactoferrin | 0     | Equ c 3    | 0    | V Pis v 3      | 0    |
| V Ana o 1       | 0    | Bos d 8           | 0     | Fag e 2    | 0    | Pla a 1        | 0    |
| Ana o 2         | 0    | V Bos d 8         | 0     | Fel d 1    | 0    | Pla a 2        | 0    |
| V Ana o 2       | 0    | aS1-casein        | 0     | Fel d 2    | 0    | Pla a 3        | 0    |
| V nAna o 2      | 0    | aS2-casein        | 0     | Fel d 4    | 0    | Pla l 1        | 0    |
| V Ana o 3       | 0    | b-casein          | 0     | Gad c 1    | 0    | Pol d 5        | 0    |
| Ani s 1         | 0    | K-casein          | 0     | Gal d 1    | 0    | Pru p 1        | 0    |
| Ani s 3         | 0    | Transferrin       | 0     | Gal d 2    | 0    | Pru p 3        | 0    |
| Api g 1         | 0    | Bos d 6           | 0     | Gal d 3    | 0    | V Pru du 3     | 0    |
| Api m 1         | 0    | V BSA             | 0     | Gal d 5    | 0    | V Pru du 4     | 0    |
| V Api m 1       | 0    | Can f 1           | 1.37  | Gly m 4    | 0    | V Pru du 6     | 0    |
| V Api m 2       | 0    | Can f 2           | 0     | Gly m 5    | 0    | V Pru du 6.01  | 0    |
| Api m 4         | 0    | Can f 3           | 0     | Gly m 6    | 0    | V Pru du 6.02  | 0    |
| V Api m 4       | 0    | V Can f 4         | 0     | Hev b 1    | 0    | Sal k 1        | 0    |
| Ara h 1         | 0    | Can f 5           | 0     | Hev b 3    | 0    | Ses i 1        | 0    |
| V Ara h 1       | 0    | V Can f 5         | 0     | Hev b 5    | 0    | Tri a 14       | 0    |
| Ara h 2         | 0    | V Can f 6         | 0     | Hev b 6.01 | 0    | Tri a 19.0101  | 0    |
| Ara h 3         | 0    | Che a 1           | 0     | Hev b 8    | 0    | Tri a aA_TI    | 0    |
| V Ara h 3       | 0    | Cla h 8           | 0     | Jug r 1    | 0    | V Tri a 36 191 | 0    |
| Ara h 6         | 0    | Cor a 1.0401      | 0     | Jug r 2    | 0    | V Tri a 36     | 0    |
| V Ara h 6       | 0    | Cor a 8           | 0     | Jug r 3    | 0    | V m43          | 0    |
| Ara h 8         | 0    | Cor a 9           | 0     | Lep d 2    | 0    | V m82          | 0    |
| Ara h 9         | 0    | Cry j 1           | 0     | Mal d 1    | 0    | Serine         | 0    |
| Art v 1         | 0    | Cyn d 1           | 0     | Mer a 1    | 0    | Thioredoxin    | 0    |
| Art v 3         | 0    | Cup a 1           | 0     | Mus m 1    | 0    | Glutathione    | 0    |
| Asp f 1         | 0    | Der f 1           | 5.58  | MUXF3      | 0    | peroxiredoxin  | 0    |
| Asp f 3         | 0    | Der f 2           | 25.64 | Ole e 1    | 0.36 | Profilin       | 0    |
| Asp f 6         | 0    | Der p 1           | 9.15  | Ole e 7    | 0    | Dehydrin       | 0    |
| Ber e 1         | 0    | Der p 2           | 16.61 | Ole e 9    | 0    | purothionin    | 0    |
| Bet v 1         | 0    | V Der p 4         | 0     | Par j 2    | 0    | LTP            | 0    |
| Bet v 2         | 0    | V Der p 5         | 0.22  | Pen m 1    | 0    | V Ves v 1      | 0    |
| Bet v 4         | 0    | V Der p 7         | 0.08  | Pen m 2    | 0    | Ves v 5        | 0    |
| Bla g 1         | 0    | Der p 10          | 0.27  | Pen m 4    | 0    | V Ves v 5      | 0    |
| Bla g 2         | 0    | V Der p 11        | 0     | Phl p 1    | 0    | Blank          | 0    |

| Patient no. PA6 |   |                   |      |            |      |                |   |
|-----------------|---|-------------------|------|------------|------|----------------|---|
| Act d 1         | 0 | Bla g 5           | 0    | V Der p 14 | 0    | Phl p 2        | 0 |
| Act d 2         | 0 | Bla g 7           | 0    | V Der p 15 | 0    | Phl p 4        | 0 |
| Act d 5         | 0 | Blo t 5           | 0.57 | V Der p 18 | 0    | Phl p 5        | 0 |
| Act d 8         | 0 | Bos d 4           | 0    | V Der p 21 | 1.44 | Phl p 6        | 0 |
| Aln g 1         | 0 | V Bos d 4         | 0    | V Der p 23 | 2.84 | Phl p 7        | 0 |
| Alt a 1         | 0 | Bos d 5           | 0    | V clone 16 | 0    | Phl p 11       | 0 |
| Alt a 6         | 0 | V Bos d 5         | 0    | Equ c 1    | 0    | Phl p 12       | 0 |
| Amb a 1         | 0 | Bos d Lactoferrin | 0    | Equ c 3    | 0    | V Pis v 3      | 0 |
| V Ana o 1       | 0 | Bos d 8           | 0    | Fag e 2    | 0    | Pla a 1        | 0 |
| Ana o 2         | 0 | V Bos d 8         | 0    | Fel d 1    | 0    | Pla a 2        | 0 |
| V Ana o 2       | 0 | aS1-casein        | 0    | Fel d 2    | 0    | Pla a 3        | 0 |
| V nAna o 2      | 0 | aS2-casein        | 0    | Fel d 4    | 0    | Pla l 1        | 0 |
| V Ana o 3       | 0 | b-casein          | 0    | Gad c 1    | 0    | Pol d 5        | 0 |
| Ani s 1         | 0 | K-casein          | 0    | Gal d 1    | 0    | Pru p 1        | 0 |
| Ani s 3         | 0 | Transferrin       | 0    | Gal d 2    | 0    | Pru p 3        | 0 |
| Api g 1         | 0 | Bos d 6           | 0    | Gal d 3    | 0    | V Pru du 3     | 0 |
| Api m 1         | 0 | V BSA             | 0    | Gal d 5    | 0    | V Pru du 4     | 0 |
| V Api m 1       | 0 | Can f 1           | 0    | Gly m 4    | 0    | V Pru du 6     | 0 |
| V Api m 2       | 0 | Can f 2           | 0    | Gly m 5    | 0    | V Pru du 6.01  | 0 |
| Api m 4         | 0 | Can f 3           | 0    | Gly m 6    | 0    | V Pru du 6.02  | 0 |
| V Api m 4       | 0 | V Can f 4         | 0    | Hev b 1    | 0    | Sal k 1        | 0 |
| Ara h 1         | 0 | Can f 5           | 0    | Hev b 3    | 0    | Ses i 1        | 0 |
| V Ara h 1       | 0 | V Can f 5         | 0    | Hev b 5    | 0    | Tri a 14       | 0 |
| Ara h 2         | 0 | V Can f 6         | 0    | Hev b 6.01 | 0    | Tri a 19.0101  | 0 |
| Ara h 3         | 0 | Che a 1           | 0    | Hev b 8    | 0    | Tri a aA_TI    | 0 |
| V Ara h 3       | 0 | Cla h 8           | 0    | Jug r 1    | 0    | V Tri a 36 191 | 0 |
| Ara h 6         | 0 | Cor a 1.0401      | 0    | Jug r 2    | 0    | V Tri a 36     | 0 |
| V Ara h 6       | 0 | Cor a 8           | 0    | Jug r 3    | 0    | V m43          | 0 |
| Ara h 8         | 0 | Cor a 9           | 0    | Lep d 2    | 0    | V m82          | 0 |
| Ara h 9         | 0 | Cry j 1           | 0    | Mal d 1    | 0    | Serine         | 0 |
| Art v 1         | 0 | Cyn d 1           | 0    | Mer a 1    | 0    | Thioredoxin    | 0 |
| Art v 3         | 0 | Cup a 1           | 0    | Mus m 1    | 0    | Glutathione    | 0 |
| Asp f 1         | 0 | Der f 1           | 1    | MUXF3      | 0    | peroxiredoxin  | 0 |
| Asp f 3         | 0 | Der f 2           | 3.99 | Ole e 1    | 0    | Profilin       | 0 |
| Asp f 6         | 0 | Der p 1           | 0.71 | Ole e 7    | 0    | Dehydrin       | 0 |
| Ber e 1         | 0 | Der p 2           | 3.25 | Ole e 9    | 0    | purothionin    | 0 |
| Bet v 1         | 0 | V Der p 4         | 0    | Par j 2    | 0    | LTP            | 0 |
| Bet v 2         | 0 | V Der p 5         | 1.73 | Pen m 1    | 0    | V Ves v 1      | 0 |
| Bet v 4         | 0 | V Der p 7         | 0.07 | Pen m 2    | 0    | Ves v 5        | 0 |
| Bla g 1         | 0 | Der p 10          | 0.09 | Pen m 4    | 0    | V Ves v 5      | 0 |
| Bla g 2         | 0 | V Der p 11        | 0    | Phl p 1    | 0    | Blank          | 0 |

| Patient no. PA7 |       |                   |       |            |      |                |      |
|-----------------|-------|-------------------|-------|------------|------|----------------|------|
| Act d 1         | 0     | Bla g 5           | 0     | V Der p 14 | 0    | Phl p 2        | 1.23 |
| Act d 2         | 0     | Bla g 7           | 0     | V Der p 15 | 0    | Phl p 4        | 0.78 |
| Act d 5         | 0     | Blo t 5           | 0     | V Der p 18 | 0    | Phl p 5        | 17.3 |
| Act d 8         | 0     | Bos d 4           | 0     | V Der p 21 | 0    | Phl p 6        | 1.42 |
| Aln g 1         | 1.06  | V Bos d 4         | 0     | V Der p 23 | 7.86 | Phl p 7        | 0    |
| Alt a 1         | 0     | Bos d 5           | 0     | V clone 16 | 0    | Phl p 11       | 1.92 |
| Alt a 6         | 0     | V Bos d 5         | 0     | Equ c 1    | 17.9 | Phl p 12       | 0    |
| Amb a 1         | 0     | Bos d Lactoferrin | 0     | Equ c 3    | 0.17 | V Pis v 3      | 0    |
| V Ana o 1       | 0     | Bos d 8           | 0     | Fag e 2    | 0    | Pla a 1        | 0    |
| Ana o 2         | 0     | V Bos d 8         | 0     | Fel d 1    | 9.68 | Pla a 2        | 0.2  |
| V Ana o 2       | 0     | aS1-casein        | 0     | Fel d 2    | 0    | Pla a 3        | 0    |
| V nAna o 2      | 0     | aS2-casein        | 0     | Fel d 4    | 9.16 | Pla l 1        | 0    |
| V Ana o 3       | 0     | b-casein          | 0     | Gad c 1    | 0    | Pol d 5        | 0    |
| Ani s 1         | 0     | K-casein          | 0     | Gal d 1    | 0    | Pru p 1        | 0.96 |
| Ani s 3         | 0     | Transferrin       | 0     | Gal d 2    | 0    | Pru p 3        | 0.1  |
| Api g 1         | 0.07  | Bos d 6           | 0     | Gal d 3    | 0    | V Pru du 3     | 0    |
| Api m 1         | 0     | V BSA             | 0     | Gal d 5    | 0    | V Pru du 4     | 0    |
| V Api m 1       | 0     | Can f 1           | 25.82 | Gly m 4    | 0.08 | V Pru du 6     | 0    |
| V Api m 2       | 0     | Can f 2           | 3.79  | Gly m 5    | 0    | V Pru du 6.01  | 0    |
| Api m 4         | 0     | Can f 3           | 0     | Gly m 6    | 0    | V Pru du 6.02  | 0    |
| V Api m 4       | 0     | V Can f 4         | 0     | Hev b 1    | 0    | Sal k 1        | 0    |
| Ara h 1         | 0     | Can f 5           | 0     | Hev b 3    | 0    | Ses i 1        | 0    |
| V Ara h 1       | 0.07  | V Can f 5         | 0     | Hev b 5    | 0    | Tri a 14       | 0    |
| Ara h 2         | 0     | V Can f 6         | 0     | Hev b 6.01 | 0    | Tri a 19.0101  | 0    |
| Ara h 3         | 0     | Che a 1           | 0.12  | Hev b 8    | 0    | Tri a aA_TI    | 0    |
| V Ara h 3       | 0     | Cla h 8           | 0     | Jug r 1    | 0    | V Tri a 36 191 | 0    |
| Ara h 6         | 0     | Cor a 1.0401      | 0.17  | Jug r 2    | 0.33 | V Tri a 36     | 0    |
| V Ara h 6       | 0     | Cor a 8           | 0.08  | Jug r 3    | 0    | V m43          | 0    |
| Ara h 8         | 0.71  | Cor a 9           | 0     | Lep d 2    | 0    | V m82          | 0    |
| Ara h 9         | 0.09  | Cry j 1           | 0.17  | Mal d 1    | 1.41 | Serine         | 0    |
| Art v 1         | 0     | Cyn d 1           | 3.02  | Mer a 1    | 0    | Thioredoxin    | 0    |
| Art v 3         | 0.13  | Cup a 1           | 0     | Mus m 1    | 3.26 | Glutathione    | 0    |
| Asp f 1         | 0     | Der f 1           | 3.87  | MUXF3      | 0    | peroxiredoxin  | 0    |
| Asp f 3         | 0     | Der f 2           | 25.44 | Ole e 1    | 0.14 | Profilin       | 0    |
| Asp f 6         | 0     | Der p 1           | 6.76  | Ole e 7    | 0    | Dehydrin       | 0    |
| Ber e 1         | 0     | Der p 2           | 25.73 | Ole e 9    | 0    | purothionin    | 0    |
| Bet v 1         | 11.67 | V Der p 4         | 0     | Par j 2    | 0    | LTP            | 0    |
| Bet v 2         | 0     | V Der p 5         | 0.14  | Pen m 1    | 0    | V Ves v 1      | 0    |
| Bet v 4         | 0     | V Der p 7         | 0.35  | Pen m 2    | 0.29 | Ves v 5        | 0    |
| Bla g 1         | 0     | Der p 10          | 0.19  | Pen m 4    | 0    | V Ves v 5      | 0    |
| Bla g 2         | 0     | V Der p 11        | 0     | Phl p 1    | 0.5  | Blank          | 0    |

| Patient no. PA8 |   |                   |       |            |      |                |      |
|-----------------|---|-------------------|-------|------------|------|----------------|------|
| Act d 1         | 0 | Bla g 5           | 0     | V Der p 14 | 0    | Phl p 2        | 0    |
| Act d 2         | 0 | Bla g 7           | 0     | V Der p 15 | 0    | Phl p 4        | 0    |
| Act d 5         | 0 | Blo t 5           | 0     | V Der p 18 | 1.34 | Phl p 5        | 0    |
| Act d 8         | 0 | Bos d 4           | 0     | V Der p 21 | 0    | Phl p 6        | 0    |
| Aln g 1         | 0 | V Bos d 4         | 0     | V Der p 23 | 0    | Phl p 7        | 0    |
| Alt a 1         | 0 | Bos d 5           | 0     | V clone 16 | 0    | Phl p 11       | 0    |
| Alt a 6         | 0 | V Bos d 5         | 0     | Equ c 1    | 0    | Phl p 12       | 0    |
| Amb a 1         | 0 | Bos d Lactoferrin | 0     | Equ c 3    | 0    | V Pis v 3      | 0    |
| V Ana o 1       | 0 | Bos d 8           | 0     | Fag e 2    | 0    | Pla a 1        | 0    |
| Ana o 2         | 0 | V Bos d 8         | 0     | Fel d 1    | 0    | Pla a 2        | 0    |
| V Ana o 2       | 0 | aS1-casein        | 0     | Fel d 2    | 0    | Pla a 3        | 0    |
| V nAna o 2      | 0 | aS2-casein        | 0     | Fel d 4    | 0    | Pla l 1        | 0    |
| V Ana o 3       | 0 | b-casein          | 0     | Gad c 1    | 0    | Pol d 5        | 1.63 |
| Ani s 1         | 0 | K-casein          | 0     | Gal d 1    | 0    | Pru p 1        | 0    |
| Ani s 3         | 0 | Transferrin       | 0     | Gal d 2    | 0    | Pru p 3        | 0    |
| Api g 1         | 0 | Bos d 6           | 0     | Gal d 3    | 0    | V Pru du 3     | 0    |
| Api m 1         | 0 | V BSA             | 0     | Gal d 5    | 0    | V Pru du 4     | 0    |
| V Api m 1       | 0 | Can f 1           | 0     | Gly m 4    | 0    | V Pru du 6     | 0    |
| V Api m 2       | 0 | Can f 2           | 0     | Gly m 5    | 0    | V Pru du 6.01  | 0    |
| Api m 4         | 0 | Can f 3           | 0     | Gly m 6    | 0    | V Pru du 6.02  | 0    |
| V Api m 4       | 0 | V Can f 4         | 0     | Hev b 1    | 0    | Sal k 1        | 0    |
| Ara h 1         | 0 | Can f 5           | 0     | Hev b 3    | 0    | Ses i 1        | 0    |
| V Ara h 1       | 0 | V Can f 5         | 0     | Hev b 5    | 0    | Tri a 14       | 0    |
| Ara h 2         | 0 | V Can f 6         | 0     | Hev b 6.01 | 0    | Tri a 19.0101  | 0    |
| Ara h 3         | 0 | Che a 1           | 0     | Hev b 8    | 0    | Tri a aA_TI    | 0    |
| V Ara h 3       | 0 | Cla h 8           | 0     | Jug r 1    | 0    | V Tri a 36 191 | 0    |
| Ara h 6         | 0 | Cor a 1.0401      | 0     | Jug r 2    | 0    | V Tri a 36     | 0    |
| V Ara h 6       | 0 | Cor a 8           | 0     | Jug r 3    | 0    | V m43          | 0    |
| Ara h 8         | 0 | Cor a 9           | 0     | Lep d 2    | 0    | V m82          | 0    |
| Ara h 9         | 0 | Cry j 1           | 0     | Mal d 1    | 0    | Serine         | 0    |
| Art v 1         | 0 | Cyn d 1           | 0     | Mer a 1    | 0    | Thioredoxin    | 0    |
| Art v 3         | 0 | Cup a 1           | 0     | Mus m 1    | 0    | Glutathione    | 0    |
| Asp f 1         | 0 | Der f 1           | 92.36 | MUXF3      | 0    | peroxiredoxin  | 0    |
| Asp f 3         | 0 | Der f 2           | 38.58 | Ole e 1    | 1.97 | Profilin       | 0    |
| Asp f 6         | 0 | Der p 1           | 26.18 | Ole e 7    | 0    | Dehydrin       | 0    |
| Ber e 1         | 0 | Der p 2           | 33.66 | Ole e 9    | 0    | purothionin    | 0    |
| Bet v 1         | 0 | V Der p 4         | 0.5   | Par j 2    | 0    | LTP            | 0    |
| Bet v 2         | 0 | V Der p 5         | 0.24  | Pen m 1    | 0    | V Ves v 1      | 0    |
| Bet v 4         | 0 | V Der p 7         | 0     | Pen m 2    | 0    | Ves v 5        | 2.36 |
| Bla g 1         | 0 | Der p 10          | 0.11  | Pen m 4    | 0    | V Ves v 5      | 0    |
| Bla g 2         | 0 | V Der p 11        | 0.13  | Phl p 1    | 0    | Blank          | 0    |



| Patient no. PA9 |      |                   |       |            |        |                |      |
|-----------------|------|-------------------|-------|------------|--------|----------------|------|
| Act d 1         | 0    | Bla g 5           | 0     | V Der p 14 | 0      | Phl p 2        | 0    |
| Act d 2         | 0    | Bla g 7           | 0     | V Der p 15 | 0      | Phl p 4        | 3.47 |
| Act d 5         | 0    | Blo t 5           | 20.35 | V Der p 18 | 0.79   | Phl p 5        | 0    |
| Act d 8         | 0    | Bos d 4           | 0.41  | V Der p 21 | 11.13  | Phl p 6        | 0    |
| Aln g 1         | 0    | V Bos d 4         | 0     | V Der p 23 | 0      | Phl p 7        | 0    |
| Alt a 1         | 0    | Bos d 5           | 0     | V clone 16 | 7.46   | Phl p 11       | 0    |
| Alt a 6         | 0    | V Bos d 5         | 0     | Equ c 1    | 0      | Phl p 12       | 0    |
| Amb a 1         | 0    | Bos d Lactoferrin | 0     | Equ c 3    | 0      | V Pis v 3      | 0    |
| V Ana o 1       | 0    | Bos d 8           | 0     | Fag e 2    | 0      | Pla a 1        | 0    |
| Ana o 2         | 0    | V Bos d 8         | 0     | Fel d 1    | 0      | Pla a 2        | 1.25 |
| V Ana o 2       | 0    | aS1-casein        | 0     | Fel d 2    | 0      | Pla a 3        | 0    |
| V nAna o 2      | 0    | aS2-casein        | 0     | Fel d 4    | 0      | Pla l 1        | 0    |
| V Ana o 3       | 0    | b-casein          | 0     | Gad c 1    | 0      | Pol d 5        | 0    |
| Ani s 1         | 0    | K-casein          | 0     | Gal d 1    | 0      | Pru p 1        | 0    |
| Ani s 3         | 0    | Transferrin       | 0     | Gal d 2    | 0      | Pru p 3        | 0    |
| Api g 1         | 0    | Bos d 6           | 0     | Gal d 3    | 0      | V Pru du 3     | 0    |
| Api m 1         | 0    | V BSA             | 0     | Gal d 5    | 0      | V Pru du 4     | 0    |
| V Api m 1       | 0.48 | Can f 1           | 0     | Gly m 4    | 0      | V Pru du 6     | 0    |
| V Api m 2       | 0    | Can f 2           | 0     | Gly m 5    | 0      | V Pru du 6.01  | 0    |
| Api m 4         | 0    | Can f 3           | 0     | Gly m 6    | 0      | V Pru du 6.02  | 0    |
| V Api m 4       | 0    | V Can f 4         | 0     | Hev b 1    | 0      | Sal k 1        | 0    |
| Ara h 1         | 0    | Can f 5           | 0     | Hev b 3    | 0      | Ses i 1        | 0    |
| V Ara h 1       | 0    | V Can f 5         | 0     | Hev b 5    | 0      | Tri a 14       | 0    |
| Ara h 2         | 0    | V Can f 6         | 0     | Hev b 6.01 | 0      | Tri a 19.0101  | 0    |
| Ara h 3         | 0    | Che a 1           | 0     | Hev b 8    | 0      | Tri a aA_TI    | 0    |
| V Ara h 3       | 0    | Cla h 8           | 0     | Jug r 1    | 0      | V Tri a 36 191 | 0    |
| Ara h 6         | 0    | Cor a 1.0401      | 0     | Jug r 2    | 1.9    | V Tri a 36     | 0    |
| V Ara h 6       | 0    | Cor a 8           | 0     | Jug r 3    | 0      | V m43          | 0    |
| Ara h 8         | 0    | Cor a 9           | 0     | Lep d 2    | 3.72   | V m82          | 0    |
| Ara h 9         | 0    | Cry j 1           | 5.51  | Mal d 1    | 0.76   | Serine         | 0    |
| Art v 1         | 0    | Cyn d 1           | 1.93  | Mer a 1    | 0      | Thioredoxin    | 0    |
| Art v 3         | 0    | Cup a 1           | 6.04  | Mus m 1    | 0      | Glutathione    | 0    |
| Asp f 1         | 0    | Der f 1           | 0     | MUXF3      | 0.19   | peroxiredoxin  | 0    |
| Asp f 3         | 0    | Der f 2           | 2.84  | Ole e 1    | 114.27 | Profilin       | 0    |
| Asp f 6         | 0    | Der p 1           | 0     | Ole e 7    | 0.26   | Dehydrin       | 0    |
| Ber e 1         | 0    | Der p 2           | 2.67  | Ole e 9    | 0      | purothionin    | 0    |
| Bet v 1         | 3.21 | V Der p 4         | 0     | Par j 2    | 0      | LTP            | 0    |
| Bet v 2         | 0    | V Der p 5         | 0     | Pen m 1    | 0      | V Ves v 1      | 0    |
| Bet v 4         | 0    | V Der p 7         | 0     | Pen m 2    | 0      | Ves v 5        | 0    |
| Bla g 1         | 0    | Der p 10          | 0     | Pen m 4    | 0      | V Ves v 5      | 0    |
| Bla g 2         | 0    | V Der p 11        | 0     | Phl p 1    | 21.08  | Blank          | 0    |

| Patient no. PA10 |      |                   |       |            |      |                |       |
|------------------|------|-------------------|-------|------------|------|----------------|-------|
| Act d 1          | 0    | Bla g 5           | 0     | V Der p 14 | 0    | Phl p 2        | 5.76  |
| Act d 2          | 0    | Bla g 7           | 0     | V Der p 15 | 0    | Phl p 4        | 0     |
| Act d 5          | 0    | Blo t 5           | 14.49 | V Der p 18 | 0    | Phl p 5        | 1.04  |
| Act d 8          | 0    | Bos d 4           | 0     | V Der p 21 | 6.96 | Phl p 6        | 0     |
| Aln g 1          | 0.4  | V Bos d 4         | 0     | V Der p 23 | 5.2  | Phl p 7        | 0     |
| Alt a 1          | 0    | Bos d 5           | 0     | V clone 16 | 0    | Phl p 11       | 2.53  |
| Alt a 6          | 0    | V Bos d 5         | 0     | Equ c 1    | 5.86 | Phl p 12       | 0     |
| Amb a 1          | 0    | Bos d Lactoferrin | 0     | Equ c 3    | 0    | V Pis v 3      | 0     |
| V Ana o 1        | 0    | Bos d 8           | 0     | Fag e 2    | 0    | Pla a 1        | 0     |
| Ana o 2          | 0    | V Bos d 8         | 0     | Fel d 1    | 8.01 | Pla a 2        | 0     |
| V Ana o 2        | 0    | aS1-casein        | 0     | Fel d 2    | 0    | Pla a 3        | 0     |
| V nAna o 2       | 0    | aS2-casein        | 0     | Fel d 4    | 3.79 | Pla l 1        | 15.21 |
| V Ana o 3        | 0    | b-casein          | 0     | Gad c 1    | 0    | Pol d 5        | 0     |
| Ani s 1          | 0    | K-casein          | 0     | Gal d 1    | 0    | Pru p 1        | 0     |
| Ani s 3          | 0    | Transferrin       | 0     | Gal d 2    | 0    | Pru p 3        | 0     |
| Api g 1          | 0    | Bos d 6           | 0     | Gal d 3    | 0    | V Pru du 3     | 0     |
| Api m 1          | 0    | V BSA             | 0     | Gal d 5    | 0    | V Pru du 4     | 0     |
| V Api m 1        | 0    | Can f 1           | 1.45  | Gly m 4    | 0    | V Pru du 6     | 0     |
| V Api m 2        | 0    | Can f 2           | 1.49  | Gly m 5    | 0    | V Pru du 6.01  | 0     |
| Api m 4          | 0    | Can f 3           | 0     | Gly m 6    | 0    | V Pru du 6.02  | 0     |
| V Api m 4        | 0    | V Can f 4         | 4.63  | Hev b 1    | 0    | Sal k 1        | 0     |
| Ara h 1          | 0    | Can f 5           | 0.44  | Hev b 3    | 0    | Ses i 1        | 0     |
| V Ara h 1        | 3.89 | V Can f 5         | 0     | Hev b 5    | 0    | Tri a 14       | 0     |
| Ara h 2          | 0    | V Can f 6         | 1.37  | Hev b 6.01 | 0    | Tri a 19.0101  | 0     |
| Ara h 3          | 0    | Che a 1           | 0     | Hev b 8    | 0    | Tri a aA_TI    | 0     |
| V Ara h 3        | 1.62 | Cla h 8           | 0     | Jug r 1    | 0.14 | V Tri a 36 191 | 0     |
| Ara h 6          | 0.55 | Cor a 1.0401      | 0     | Jug r 2    | 0    | V Tri a 36     | 0     |
| V Ara h 6        | 1.23 | Cor a 8           | 0     | Jug r 3    | 0    | V m43          | 0     |
| Ara h 8          | 0    | Cor a 9           | 0     | Lep d 2    | 0    | V m82          | 0     |
| Ara h 9          | 0    | Cry j 1           | 0.22  | Mal d 1    | 0.45 | Serine         | 0     |
| Art v 1          | 0    | Cyn d 1           | 19.38 | Mer a 1    | 0    | Thioredoxin    | 0     |
| Art v 3          | 0    | Cup a 1           | 7.89  | Mus m 1    | 1.24 | Glutathione    | 0     |
| Asp f 1          | 0    | Der f 1           | 5.01  | MUXF3      | 0    | peroxiredoxin  | 0     |
| Asp f 3          | 0    | Der f 2           | 44.87 | Ole e 1    | 0    | Profilin       | 0     |
| Asp f 6          | 0.43 | Der p 1           | 1.04  | Ole e 7    | 0    | Dehydrin       | 0     |
| Ber e 1          | 0    | Der p 2           | 34.69 | Ole e 9    | 0    | purothionin    | 0     |
| Bet v 1          | 3.31 | V Der p 4         | 0     | Par j 2    | 0    | LTP            | 0     |
| Bet v 2          | 0    | V Der p 5         | 0     | Pen m 1    | 0    | V Ves v 1      | 0     |
| Bet v 4          | 0    | V Der p 7         | 0     | Pen m 2    | 0    | Ves v 5        | 0     |
| Bla g 1          | 0    | Der p 10          | 0     | Pen m 4    | 0    | V Ves v 5      | 0     |
| Bla g 2          | 0    | V Der p 11        | 0     | Phl p 1    | 0.93 | Blank          | 0     |

| Patient no. PA11 |   |                   |       |            |       |                |      |
|------------------|---|-------------------|-------|------------|-------|----------------|------|
| Act d 1          | 0 | Bla g 5           | 0     | V Der p 14 | 0     | Phl p 2        | 0    |
| Act d 2          | 0 | Bla g 7           | 0     | V Der p 15 | 0     | Phl p 4        | 0.31 |
| Act d 5          | 0 | Blo t 5           | 0.1   | V Der p 18 | 0     | Phl p 5        | 0    |
| Act d 8          | 0 | Bos d 4           | 0     | V Der p 21 | 4.22  | Phl p 6        | 0    |
| Aln g 1          | 0 | V Bos d 4         | 0     | V Der p 23 | 2.63  | Phl p 7        | 0    |
| Alt a 1          | 0 | Bos d 5           | 0     | V clone 16 | 0     | Phl p 11       | 0    |
| Alt a 6          | 0 | V Bos d 5         | 0     | Equ c 1    | 0     | Phl p 12       | 0    |
| Amb a 1          | 0 | Bos d Lactoferrin | 0     | Equ c 3    | 0     | V Pis v 3      | 0    |
| V Ana o 1        | 0 | Bos d 8           | 0     | Fag e 2    | 0     | Pla a 1        | 0    |
| Ana o 2          | 0 | V Bos d 8         | 0     | Fel d 1    | 0     | Pla a 2        | 0    |
| V Ana o 2        | 0 | aS1-casein        | 0     | Fel d 2    | 0     | Pla a 3        | 0    |
| V nAna o 2       | 0 | aS2-casein        | 0     | Fel d 4    | 0     | Pla l 1        | 0    |
| V Ana o 3        | 0 | b-casein          | 0     | Gad c 1    | 0     | Pol d 5        | 0    |
| Ani s 1          | 0 | K-casein          | 0     | Gal d 1    | 0     | Pru p 1        | 0    |
| Ani s 3          | 0 | Transferrin       | 0     | Gal d 2    | 0     | Pru p 3        | 0    |
| Api g 1          | 0 | Bos d 6           | 0     | Gal d 3    | 0     | V Pru du 3     | 0    |
| Api m 1          | 0 | V BSA             | 0     | Gal d 5    | 0     | V Pru du 4     | 0    |
| V Api m 1        | 0 | Can f 1           | 31.55 | Gly m 4    | 0     | V Pru du 6     | 0    |
| V Api m 2        | 0 | Can f 2           | 0.15  | Gly m 5    | 0     | V Pru du 6.01  | 0    |
| Api m 4          | 0 | Can f 3           | 0     | Gly m 6    | 0     | V Pru du 6.02  | 0    |
| V Api m 4        | 0 | V Can f 4         | 0     | Hev b 1    | 0     | Sal k 1        | 0    |
| Ara h 1          | 0 | Can f 5           | 0     | Hev b 3    | 0     | Ses i 1        | 0    |
| V Ara h 1        | 0 | V Can f 5         | 0     | Hev b 5    | 0     | Tri a 14       | 0    |
| Ara h 2          | 0 | V Can f 6         | 0     | Hev b 6.01 | 0     | Tri a 19.0101  | 0    |
| Ara h 3          | 0 | Che a 1           | 0     | Hev b 8    | 0     | Tri a aA_TI    | 0    |
| V Ara h 3        | 0 | Cla h 8           | 0     | Jug r 1    | 0     | V Tri a 36 191 | 0    |
| Ara h 6          | 0 | Cor a 1.0401      | 0     | Jug r 2    | 0     | V Tri a 36     | 0    |
| V Ara h 6        | 0 | Cor a 8           | 0     | Jug r 3    | 0     | V m43          | 0    |
| Ara h 8          | 0 | Cor a 9           | 0     | Lep d 2    | 0.31  | V m82          | 0    |
| Ara h 9          | 0 | Cry j 1           | 0     | Mal d 1    | 0     | Serine         | 0    |
| Art v 1          | 0 | Cyn d 1           | 11.81 | Mer a 1    | 0     | Thioredoxin    | 0    |
| Art v 3          | 0 | Cup a 1           | 0     | Mus m 1    | 0     | Glutathione    | 0    |
| Asp f 1          | 0 | Der f 1           | 15.21 | MUXF3      | 0     | peroxiredoxin  | 0    |
| Asp f 3          | 0 | Der f 2           | 78.88 | Ole e 1    | 14.49 | Profilin       | 0    |
| Asp f 6          | 0 | Der p 1           | 20.52 | Ole e 7    | 0     | Dehydrin       | 0    |
| Ber e 1          | 0 | Der p 2           | 78.98 | Ole e 9    | 0     | purothionin    | 0    |
| Bet v 1          | 0 | V Der p 4         | 0.35  | Par j 2    | 0     | LTP            | 0    |
| Bet v 2          | 0 | V Der p 5         | 0     | Pen m 1    | 0     | V Ves v 1      | 0    |
| Bet v 4          | 0 | V Der p 7         | 0     | Pen m 2    | 0     | Ves v 5        | 0    |
| Bla g 1          | 0 | Der p 10          | 0     | Pen m 4    | 0     | V Ves v 5      | 0    |
| Bla g 2          | 0 | V Der p 11        | 0     | Phl p 1    | 10.05 | Blank          | 0    |

| Patient no. PA12 |       |                   |       |            |       |                |      |
|------------------|-------|-------------------|-------|------------|-------|----------------|------|
| Act d 1          | 13.72 | Bla g 5           | 0     | V Der p 14 | 0     | Phl p 2        | 0    |
| Act d 2          | 0     | Bla g 7           | 0     | V Der p 15 | 0     | Phl p 4        | 0    |
| Act d 5          | 0     | Blo t 5           | 3.06  | V Der p 18 | 0     | Phl p 5        | 5.86 |
| Act d 8          | 0     | Bos d 4           | 0     | V Der p 21 | 0     | Phl p 6        | 0.4  |
| Aln g 1          | 0     | V Bos d 4         | 0     | V Der p 23 | 0     | Phl p 7        | 0    |
| Alt a 1          | 0     | Bos d 5           | 0     | V clone 16 | 0     | Phl p 11       | 0    |
| Alt a 6          | 0     | V Bos d 5         | 0     | Equ c 1    | 2.16  | Phl p 12       | 0    |
| Amb a 1          | 0     | Bos d Lactoferrin | 0.26  | Equ c 3    | 0     | V Pis v 3      | 0    |
| V Ana o 1        | 0     | Bos d 8           | 0     | Fag e 2    | 0     | Pla a 1        | 0    |
| Ana o 2          | 0     | V Bos d 8         | 0     | Fel d 1    | 27.74 | Pla a 2        | 0    |
| V Ana o 2        | 0     | aS1-casein        | 0     | Fel d 2    | 1.98  | Pla a 3        | 0    |
| V nAna o 2       | 0     | aS2-casein        | 0     | Fel d 4    | 5.15  | Pla l 1        | 0    |
| V Ana o 3        | 0     | b-casein          | 0     | Gad c 1    | 0     | Pol d 5        | 0    |
| Ani s 1          | 0.2   | K-casein          | 0     | Gal d 1    | 0     | Pru p 1        | 0    |
| Ani s 3          | 0     | Transferrin       | 0     | Gal d 2    | 0     | Pru p 3        | 0    |
| Api g 1          | 1.34  | Bos d 6           | 0.12  | Gal d 3    | 0     | V Pru du 3     | 0.42 |
| Api m 1          | 0.54  | V BSA             | 0     | Gal d 5    | 0     | V Pru du 4     | 0    |
| V Api m 1        | 0     | Can f 1           | 38.77 | Gly m 4    | 0     | V Pru du 6     | 0    |
| V Api m 2        | 0.32  | Can f 2           | 4.08  | Gly m 5    | 0     | V Pru du 6.01  | 0    |
| Api m 4          | 0     | Can f 3           | 0.98  | Gly m 6    | 0     | V Pru du 6.02  | 0    |
| V Api m 4        | 0     | V Can f 4         | 0     | Hev b 1    | 0     | Sal k 1        | 0    |
| Ara h 1          | 0.37  | Can f 5           | 3.68  | Hev b 3    | 0     | Ses i 1        | 0    |
| V Ara h 1        | 0.18  | V Can f 5         | 0.33  | Hev b 5    | 0     | Tri a 14       | 0    |
| Ara h 2          | 0     | V Can f 6         | 8.45  | Hev b 6.01 | 0     | Tri a 19.0101  | 0    |
| Ara h 3          | 0     | Che a 1           | 0     | Hev b 8    | 0     | Tri a aA_TI    | 0    |
| V Ara h 3        | 0.15  | Cla h 8           | 0     | Jug r 1    | 0     | V Tri a 36 191 | 0    |
| Ara h 6          | 0     | Cor a 1.0401      | 0     | Jug r 2    | 0     | V Tri a 36     | 0    |
| V Ara h 6        | 0     | Cor a 8           | 0     | Jug r 3    | 0     | V m43          | 0    |
| Ara h 8          | 0     | Cor a 9           | 0     | Lep d 2    | 0     | V m82          | 0    |
| Ara h 9          | 0     | Cry j 1           | 0     | Mal d 1    | 0.13  | Serine         | 0    |
| Art v 1          | 3.35  | Cyn d 1           | 3.59  | Mer a 1    | 0     | Thioredoxin    | 0    |
| Art v 3          | 0     | Cup a 1           | 0     | Mus m 1    | 0.95  | Glutathione    | 0    |
| Asp f 1          | 0     | Der f 1           | 4.3   | MUXF3      | 0     | peroxiredoxin  | 0    |
| Asp f 3          | 0     | Der f 2           | 0.39  | Ole e 1    | 0     | Profilin       | 0    |
| Asp f 6          | 0     | Der p 1           | 1.34  | Ole e 7    | 0     | Dehydrin       | 0    |
| Ber e 1          | 0     | Der p 2           | 0.18  | Ole e 9    | 0     | purothionin    | 0    |
| Bet v 1          | 0     | V Der p 4         | 0     | Par j 2    | 0     | LTP            | 0    |
| Bet v 2          | 0     | V Der p 5         | 9.74  | Pen m 1    | 0     | V Ves v 1      | 0    |
| Bet v 4          | 0     | V Der p 7         | 0.85  | Pen m 2    | 0     | Ves v 5        | 0.11 |
| Bla g 1          | 0     | Der p 10          | 0     | Pen m 4    | 0     | V Ves v 5      | 0    |
| Bla g 2          | 0     | V Der p 11        | 0     | Phl p 1    | 10.36 | Blank          | 0    |

| Patient no. PA13 |      |                   |       |            |       |                |       |
|------------------|------|-------------------|-------|------------|-------|----------------|-------|
| Act d 1          | 0    | Bla g 5           | 0     | V Der p 14 | 0.2   | Phl p 2        | 0.14  |
| Act d 2          | 0.22 | Bla g 7           | 0     | V Der p 15 | 0.24  | Phl p 4        | 1.25  |
| Act d 5          | 0    | Blo t 5           | 3.17  | V Der p 18 | 6.37  | Phl p 5        | 22.01 |
| Act d 8          | 0    | Bos d 4           | 0.34  | V Der p 21 | 1.55  | Phl p 6        | 0.8   |
| Aln g 1          | 0    | V Bos d 4         | 0     | V Der p 23 | 5.8   | Phl p 7        | 0     |
| Alt a 1          | 1.87 | Bos d 5           | 0     | V clone 16 | 0     | Phl p 11       | 0     |
| Alt a 6          | 0    | V Bos d 5         | 0     | Equ c 1    | 0     | Phl p 12       | 0     |
| Amb a 1          | 0    | Bos d Lactoferrin | 0     | Equ c 3    | 0     | V Pis v 3      | 0     |
| V Ana o 1        | 0    | Bos d 8           | 0     | Fag e 2    | 0     | Pla a 1        | 0     |
| Ana o 2          | 0    | V Bos d 8         | 0     | Fel d 1    | 0     | Pla a 2        | 0     |
| V Ana o 2        | 0    | aS1-casein        | 0     | Fel d 2    | 0     | Pla a 3        | 0     |
| V nAna o 2       | 0    | aS2-casein        | 0     | Fel d 4    | 0     | Pla l 1        | 0     |
| V Ana o 3        | 0    | b-casein          | 0     | Gad c 1    | 0     | Pol d 5        | 0.12  |
| Ani s 1          | 0.21 | K-casein          | 0     | Gal d 1    | 0     | Pru p 1        | 0     |
| Ani s 3          | 0    | Transferrin       | 0     | Gal d 2    | 0     | Pru p 3        | 0     |
| Api g 1          | 0.92 | Bos d 6           | 0     | Gal d 3    | 0     | V Pru du 3     | 0     |
| Api m 1          | 0.38 | V BSA             | 0     | Gal d 5    | 0     | V Pru du 4     | 0     |
| V Api m 1        | 0.17 | Can f 1           | 0     | Gly m 4    | 0     | V Pru du 6     | 0     |
| V Api m 2        | 0.28 | Can f 2           | 0     | Gly m 5    | 0     | V Pru du 6.01  | 0     |
| Api m 4          | 0    | Can f 3           | 0     | Gly m 6    | 0     | V Pru du 6.02  | 0     |
| V Api m 4        | 0    | V Can f 4         | 0     | Hev b 1    | 0     | Sal k 1        | 0     |
| Ara h 1          | 0.31 | Can f 5           | 0     | Hev b 3    | 0.37  | Ses i 1        | 0     |
| V Ara h 1        | 0.19 | V Can f 5         | 0     | Hev b 5    | 0     | Tri a 14       | 0     |
| Ara h 2          | 0    | V Can f 6         | 0     | Hev b 6.01 | 0.12  | Tri a 19.0101  | 0.24  |
| Ara h 3          | 0    | Che a 1           | 0     | Hev b 8    | 0.13  | Tri a aA_TI    | 0     |
| V Ara h 3        | 0.14 | Cla h 8           | 0     | Jug r 1    | 0     | V Tri a 36 191 | 0     |
| Ara h 6          | 0    | Cor a 1.0401      | 0     | Jug r 2    | 0     | V Tri a 36     | 0     |
| V Ara h 6        | 0    | Cor a 8           | 0     | Jug r 3    | 0     | V m43          | 0     |
| Ara h 8          | 0    | Cor a 9           | 0     | Lep d 2    | 0     | V m82          | 0     |
| Ara h 9          | 0    | Cry j 1           | 0     | Mal d 1    | 0.22  | Serine         | 0     |
| Art v 1          | 0    | Cyn d 1           | 4.64  | Mer a 1    | 0     | Thioredoxin    | 0     |
| Art v 3          | 0    | Cup a 1           | 0     | Mus m 1    | 0     | Glutathione    | 0     |
| Asp f 1          | 0    | Der f 1           | 12.39 | MUXF3      | 0     | peroxiredoxin  | 0     |
| Asp f 3          | 0    | Der f 2           | 17    | Ole e 1    | 0     | Profilin       | 0     |
| Asp f 6          | 0    | Der p 1           | 2.87  | Ole e 7    | 0     | Dehydrin       | 0     |
| Ber e 1          | 0    | Der p 2           | 14.18 | Ole e 9    | 0     | purothionin    | 0     |
| Bet v 1          | 0    | V Der p 4         | 0     | Par j 2    | 0     | LTP            | 0     |
| Bet v 2          | 0    | V Der p 5         | 14.24 | Pen m 1    | 0     | V Ves v 1      | 0     |
| Bet v 4          | 0    | V Der p 7         | 0.96  | Pen m 2    | 0     | Ves v 5        | 0.12  |
| Bla g 1          | 0    | Der p 10          | 0.32  | Pen m 4    | 0     | V Ves v 5      | 0     |
| Bla g 2          | 0    | V Der p 11        | 0.21  | Phl p 1    | 12.91 | Blank          | 0     |

| Patient no. PA14 |      |                   |      |            |      |                |   |
|------------------|------|-------------------|------|------------|------|----------------|---|
| Act d 1          | 0    | Bla g 5           | 0    | V Der p 14 | 0    | Phl p 2        | 0 |
| Act d 2          | 0    | Bla g 7           | 0    | V Der p 15 | 0    | Phl p 4        | 0 |
| Act d 5          | 0    | Blo t 5           | 0.46 | V Der p 18 | 0    | Phl p 5        | 0 |
| Act d 8          | 0    | Bos d 4           | 0    | V Der p 21 | 4.52 | Phl p 6        | 0 |
| Aln g 1          | 0    | V Bos d 4         | 0    | V Der p 23 | 7.11 | Phl p 7        | 0 |
| Alt a 1          | 0    | Bos d 5           | 0    | V clone 16 | 0    | Phl p 11       | 0 |
| Alt a 6          | 0    | V Bos d 5         | 0    | Equ c 1    | 0    | Phl p 12       | 0 |
| Amb a 1          | 0    | Bos d Lactoferrin | 0.25 | Equ c 3    | 0    | V Pis v 3      | 0 |
| V Ana o 1        | 0    | Bos d 8           | 0    | Fag e 2    | 0    | Pla a 1        | 0 |
| Ana o 2          | 0    | V Bos d 8         | 0    | Fel d 1    | 0    | Pla a 2        | 0 |
| V Ana o 2        | 0    | aS1-casein        | 0    | Fel d 2    | 0    | Pla a 3        | 0 |
| V nAna o 2       | 0    | aS2-casein        | 0    | Fel d 4    | 0    | Pla l 1        | 0 |
| V Ana o 3        | 0    | b-casein          | 0    | Gad c 1    | 0    | Pol d 5        | 0 |
| Ani s 1          | 0.12 | K-casein          | 0    | Gal d 1    | 0    | Pru p 1        | 0 |
| Ani s 3          | 0    | Transferrin       | 0    | Gal d 2    | 0    | Pru p 3        | 0 |
| Api g 1          | 0.81 | Bos d 6           | 0    | Gal d 3    | 0    | V Pru du 3     | 0 |
| Api m 1          | 0.31 | V BSA             | 0    | Gal d 5    | 0    | V Pru du 4     | 0 |
| V Api m 1        | 0.14 | Can f 1           | 0    | Gly m 4    | 0    | V Pru du 6     | 0 |
| V Api m 2        | 0.19 | Can f 2           | 0    | Gly m 5    | 0    | V Pru du 6.01  | 0 |
| Api m 4          | 0    | Can f 3           | 0    | Gly m 6    | 0    | V Pru du 6.02  | 0 |
| V Api m 4        | 0    | V Can f 4         | 0    | Hev b 1    | 0    | Sal k 1        | 0 |
| Ara h 1          | 0.27 | Can f 5           | 0    | Hev b 3    | 0    | Ses i 1        | 0 |
| V Ara h 1        | 0.13 | V Can f 5         | 0    | Hev b 5    | 0    | Tri a 14       | 0 |
| Ara h 2          | 0    | V Can f 6         | 0    | Hev b 6.01 | 0    | Tri a 19.0101  | 0 |
| Ara h 3          | 0    | Che a 1           | 0    | Hev b 8    | 0    | Tri a aA_TI    | 0 |
| V Ara h 3        | 0.11 | Cla h 8           | 0    | Jug r 1    | 0    | V Tri a 36 191 | 0 |
| Ara h 6          | 0    | Cor a 1.0401      | 0    | Jug r 2    | 0    | V Tri a 36     | 0 |
| V Ara h 6        | 0    | Cor a 8           | 0    | Jug r 3    | 0    | V m43          | 0 |
| Ara h 8          | 0    | Cor a 9           | 0    | Lep d 2    | 0    | V m82          | 0 |
| Ara h 9          | 0    | Cry j 1           | 0    | Mal d 1    | 0    | Serine         | 0 |
| Art v 1          | 0    | Cyn d 1           | 0    | Mer a 1    | 0    | Thioredoxin    | 0 |
| Art v 3          | 0    | Cup a 1           | 0    | Mus m 1    | 0    | Glutathione    | 0 |
| Asp f 1          | 0    | Der f 1           | 1.15 | MUXF3      | 0    | peroxiredoxin  | 0 |
| Asp f 3          | 0    | Der f 2           | 0.11 | Ole e 1    | 0    | Profilin       | 0 |
| Asp f 6          | 0    | Der p 1           | 0.64 | Ole e 7    | 0    | Dehydrin       | 0 |
| Ber e 1          | 0    | Der p 2           | 0.13 | Ole e 9    | 0    | purothionin    | 0 |
| Bet v 1          | 0    | V Der p 4         | 0    | Par j 2    | 0    | LTP            | 0 |
| Bet v 2          | 0    | V Der p 5         | 9.63 | Pen m 1    | 0    | V Ves v 1      | 0 |
| Bet v 4          | 0    | V Der p 7         | 0    | Pen m 2    | 0    | Ves v 5        | 0 |
| Bla g 1          | 0    | Der p 10          | 0    | Pen m 4    | 0    | V Ves v 5      | 0 |
| Bla g 2          | 0    | V Der p 11        | 0    | Phl p 1    | 0    | Blank          | 0 |

| Patient no. PA15 |      |                   |       |            |      |                |      |
|------------------|------|-------------------|-------|------------|------|----------------|------|
| Act d 1          | 2.35 | Bla g 5           | 0     | V Der p 14 | 0    | Phl p 2        | 0.24 |
| Act d 2          | 0    | Bla g 7           | 0     | V Der p 15 | 0    | Phl p 4        | 0.82 |
| Act d 5          | 0    | Blo t 5           | 0.3   | V Der p 18 | 0    | Phl p 5        | 0    |
| Act d 8          | 0    | Bos d 4           | 0     | V Der p 21 | 0.33 | Phl p 6        | 0    |
| Aln g 1          | 0    | V Bos d 4         | 0     | V Der p 23 | 9.47 | Phl p 7        | 0    |
| Alt a 1          | 0    | Bos d 5           | 0     | V clone 16 | 0.72 | Phl p 11       | 0    |
| Alt a 6          | 0    | V Bos d 5         | 0     | Equ c 1    | 0    | Phl p 12       | 0    |
| Amb a 1          | 0    | Bos d Lactoferrin | 0.36  | Equ c 3    | 0    | V Pis v 3      | 0    |
| V Ana o 1        | 0    | Bos d 8           | 0     | Fag e 2    | 0    | Pla a 1        | 0    |
| Ana o 2          | 0    | V Bos d 8         | 0     | Fel d 1    | 7.47 | Pla a 2        | 0    |
| V Ana o 2        | 0    | aS1-casein        | 0     | Fel d 2    | 1.52 | Pla a 3        | 0    |
| V nAna o 2       | 0    | aS2-casein        | 0.18  | Fel d 4    | 0    | Pla l 1        | 0    |
| V Ana o 3        | 0    | b-casein          | 0.3   | Gad c 1    | 0    | Pol d 5        | 0    |
| Ani s 1          | 0.32 | K-casein          | 0     | Gal d 1    | 0    | Pru p 1        | 0    |
| Ani s 3          | 0    | Transferrin       | 0     | Gal d 2    | 0    | Pru p 3        | 0    |
| Api g 1          | 2.08 | Bos d 6           | 0     | Gal d 3    | 0    | V Pru du 3     | 0    |
| Api m 1          | 0.63 | V BSA             | 0     | Gal d 5    | 0    | V Pru du 4     | 0    |
| V Api m 1        | 0    | Can f 1           | 7.91  | Gly m 4    | 0    | V Pru du 6     | 0    |
| V Api m 2        | 0.41 | Can f 2           | 1.18  | Gly m 5    | 0    | V Pru du 6.01  | 0    |
| Api m 4          | 0    | Can f 3           | 0     | Gly m 6    | 0    | V Pru du 6.02  | 0    |
| V Api m 4        | 0    | V Can f 4         | 0     | Hev b 1    | 0.12 | Sal k 1        | 0.15 |
| Ara h 1          | 0.48 | Can f 5           | 0     | Hev b 3    | 0.2  | Ses i 1        | 0    |
| V Ara h 1        | 0.33 | V Can f 5         | 0     | Hev b 5    | 0    | Tri a 14       | 0    |
| Ara h 2          | 0    | V Can f 6         | 0     | Hev b 6.01 | 0    | Tri a 19.0101  | 0    |
| Ara h 3          | 0.22 | Che a 1           | 0     | Hev b 8    | 0.18 | Tri a aA_TI    | 0    |
| V Ara h 3        | 0.18 | Cla h 8           | 0     | Jug r 1    | 0    | V Tri a 36 191 | 0    |
| Ara h 6          | 0    | Cor a 1.0401      | 0.64  | Jug r 2    | 0    | V Tri a 36     | 0.21 |
| V Ara h 6        | 0    | Cor a 8           | 0     | Jug r 3    | 0    | V m43          | 0    |
| Ara h 8          | 0    | Cor a 9           | 0     | Lep d 2    | 0    | V m82          | 0    |
| Ara h 9          | 0    | Cry j 1           | 0     | Mal d 1    | 0.87 | Serine         | 0    |
| Art v 1          | 0    | Cyn d 1           | 8.63  | Mer a 1    | 0    | Thioredoxin    | 0    |
| Art v 3          | 0    | Cup a 1           | 1.77  | Mus m 1    | 0    | Glutathione    | 0    |
| Asp f 1          | 0    | Der f 1           | 2.17  | MUXF3      | 0    | peroxiredoxin  | 0    |
| Asp f 3          | 0    | Der f 2           | 17.64 | Ole e 1    | 0    | Profilin       | 0    |
| Asp f 6          | 0    | Der p 1           | 1.2   | Ole e 7    | 0    | Dehydrin       | 0    |
| Ber e 1          | 0    | Der p 2           | 27.51 | Ole e 9    | 0.14 | purothionin    | 0    |
| Bet v 1          | 6.99 | V Der p 4         | 0     | Par j 2    | 0    | LTP            | 0    |
| Bet v 2          | 0    | V Der p 5         | 2.37  | Pen m 1    | 0    | V Ves v 1      | 0    |
| Bet v 4          | 0    | V Der p 7         | 0.43  | Pen m 2    | 0    | Ves v 5        | 1.37 |
| Bla g 1          | 0    | Der p 10          | 0     | Pen m 4    | 0    | V Ves v 5      | 0    |
| Bla g 2          | 0    | V Der p 11        | 0     | Phl p 1    | 1.57 | Blank          | 0    |

| Patient no. PA16 |      |                   |      |            |       |                |      |
|------------------|------|-------------------|------|------------|-------|----------------|------|
| Act d 1          | 0    | Bla g 5           | 0    | V Der p 14 | 0     | Phl p 2        | 0    |
| Act d 2          | 0    | Bla g 7           | 0    | V Der p 15 | 0     | Phl p 4        | 2.33 |
| Act d 5          | 0    | Blo t 5           | 0    | V Der p 18 | 1.03  | Phl p 5        | 0.55 |
| Act d 8          | 0    | Bos d 4           | 0    | V Der p 21 | 0.33  | Phl p 6        | 0.15 |
| Aln g 1          | 3.24 | V Bos d 4         | 0    | V Der p 23 | 0     | Phl p 7        | 0    |
| Alt a 1          | 0    | Bos d 5           | 0    | V clone 16 | 0.56  | Phl p 11       | 0    |
| Alt a 6          | 0    | V Bos d 5         | 0    | Equ c 1    | 0     | Phl p 12       | 0.11 |
| Amb a 1          | 0    | Bos d Lactoferrin | 0    | Equ c 3    | 0     | V Pis v 3      | 0    |
| V Ana o 1        | 0    | Bos d 8           | 0    | Fag e 2    | 0     | Pla a 1        | 0    |
| Ana o 2          | 0    | V Bos d 8         | 0    | Fel d 1    | 0.61  | Pla a 2        | 0    |
| V Ana o 2        | 0    | aS1-casein        | 0    | Fel d 2    | 0     | Pla a 3        | 0    |
| V nAna o 2       | 0    | aS2-casein        | 0    | Fel d 4    | 0     | Pla l 1        | 0    |
| V Ana o 3        | 0    | b-casein          | 0    | Gad c 1    | 0     | Pol d 5        | 0    |
| Ani s 1          | 0    | K-casein          | 0    | Gal d 1    | 0     | Pru p 1        | 0.43 |
| Ani s 3          | 0    | Transferrin       | 0    | Gal d 2    | 0     | Pru p 3        | 0    |
| Api g 1          | 0.14 | Bos d 6           | 0    | Gal d 3    | 0     | V Pru du 3     | 0    |
| Api m 1          | 0    | V BSA             | 0    | Gal d 5    | 0     | V Pru du 4     | 0.19 |
| V Api m 1        | 0    | Can f 1           | 0    | Gly m 4    | 0     | V Pru du 6     | 0    |
| V Api m 2        | 0    | Can f 2           | 0    | Gly m 5    | 0     | V Pru du 6.01  | 0    |
| Api m 4          | 0    | Can f 3           | 0    | Gly m 6    | 0     | V Pru du 6.02  | 0    |
| V Api m 4        | 0    | V Can f 4         | 0    | Hev b 1    | 0     | Sal k 1        | 0    |
| Ara h 1          | 0    | Can f 5           | 0    | Hev b 3    | 0     | Ses i 1        | 0    |
| V Ara h 1        | 0    | V Can f 5         | 0    | Hev b 5    | 0     | Tri a 14       | 0    |
| Ara h 2          | 0    | V Can f 6         | 0    | Hev b 6.01 | 0     | Tri a 19.0101  | 0    |
| Ara h 3          | 0    | Che a 1           | 0    | Hev b 8    | 0.43  | Tri a aA_TI    | 0    |
| V Ara h 3        | 0    | Cla h 8           | 0    | Jug r 1    | 0     | V Tri a 36 191 | 0    |
| Ara h 6          | 0    | Cor a 1.0401      | 3.04 | Jug r 2    | 0     | V Tri a 36     | 0    |
| V Ara h 6        | 0    | Cor a 8           | 0    | Jug r 3    | 0     | V m43          | 0    |
| Ara h 8          | 0.18 | Cor a 9           | 0    | Lep d 2    | 0     | V m82          | 0    |
| Ara h 9          | 0    | Cry j 1           | 0    | Mal d 1    | 0.49  | Serine         | 0    |
| Art v 1          | 0    | Cyn d 1           | 2.09 | Mer a 1    | 0.2   | Thioredoxin    | 0    |
| Art v 3          | 0    | Cup a 1           | 0    | Mus m 1    | 0     | Glutathione    | 0    |
| Asp f 1          | 0    | Der f 1           | 8.1  | MUXF3      | 0     | peroxiredoxin  | 0    |
| Asp f 3          | 0    | Der f 2           | 7.01 | Ole e 1    | 0.23  | Profilin       | 0.13 |
| Asp f 6          | 0    | Der p 1           | 4.29 | Ole e 7    | 0     | Dehydrin       | 0    |
| Ber e 1          | 0    | Der p 2           | 2.89 | Ole e 9    | 0     | purothionin    | 0    |
| Bet v 1          | 5.57 | V Der p 4         | 0    | Par j 2    | 0     | LTP            | 0    |
| Bet v 2          | 0.32 | V Der p 5         | 0    | Pen m 1    | 0     | V Ves v 1      | 0    |
| Bet v 4          | 0    | V Der p 7         | 0    | Pen m 2    | 0     | Ves v 5        | 0    |
| Bla g 1          | 0    | Der p 10          | 0    | Pen m 4    | 0     | V Ves v 5      | 0    |
| Bla g 2          | 0    | V Der p 11        | 0    | Phl p 1    | 13.43 | Blank          | 0    |



| Patient no. PA17 |   |                   |      |            |      |                |   |
|------------------|---|-------------------|------|------------|------|----------------|---|
| Act d 1          | 0 | Bla g 5           | 0    | V Der p 14 | 0    | Phl p 2        | 0 |
| Act d 2          | 0 | Bla g 7           | 0    | V Der p 15 | 0    | Phl p 4        | 0 |
| Act d 5          | 0 | Blo t 5           | 0    | V Der p 18 | 0    | Phl p 5        | 0 |
| Act d 8          | 0 | Bos d 4           | 0    | V Der p 21 | 0    | Phl p 6        | 0 |
| Aln g 1          | 0 | V Bos d 4         | 0    | V Der p 23 | 0    | Phl p 7        | 0 |
| Alt a 1          | 0 | Bos d 5           | 0    | V clone 16 | 0    | Phl p 11       | 0 |
| Alt a 6          | 0 | V Bos d 5         | 0    | Equ c 1    | 0    | Phl p 12       | 0 |
| Amb a 1          | 0 | Bos d Lactoferrin | 0    | Equ c 3    | 0    | V Pis v 3      | 0 |
| V Ana o 1        | 0 | Bos d 8           | 0    | Fag e 2    | 0    | Pla a 1        | 0 |
| Ana o 2          | 0 | V Bos d 8         | 0    | Fel d 1    | 0.37 | Pla a 2        | 0 |
| V Ana o 2        | 0 | aS1-casein        | 0    | Fel d 2    | 0    | Pla a 3        | 0 |
| V nAna o 2       | 0 | aS2-casein        | 0    | Fel d 4    | 0    | Pla l 1        | 0 |
| V Ana o 3        | 0 | b-casein          | 0    | Gad c 1    | 0    | Pol d 5        | 0 |
| Ani s 1          | 0 | K-casein          | 0    | Gal d 1    | 0    | Pru p 1        | 0 |
| Ani s 3          | 0 | Transferrin       | 0    | Gal d 2    | 0    | Pru p 3        | 0 |
| Api g 1          | 0 | Bos d 6           | 0    | Gal d 3    | 0    | V Pru du 3     | 0 |
| Api m 1          | 0 | V BSA             | 0    | Gal d 5    | 0    | V Pru du 4     | 0 |
| V Api m 1        | 0 | Can f 1           | 0    | Gly m 4    | 0    | V Pru du 6     | 0 |
| V Api m 2        | 0 | Can f 2           | 0    | Gly m 5    | 0    | V Pru du 6.01  | 0 |
| Api m 4          | 0 | Can f 3           | 0    | Gly m 6    | 0    | V Pru du 6.02  | 0 |
| V Api m 4        | 0 | V Can f 4         | 0    | Hev b 1    | 0    | Sal k 1        | 0 |
| Ara h 1          | 0 | Can f 5           | 0    | Hev b 3    | 0    | Ses i 1        | 0 |
| V Ara h 1        | 0 | V Can f 5         | 0    | Hev b 5    | 0    | Tri a 14       | 0 |
| Ara h 2          | 0 | V Can f 6         | 0    | Hev b 6.01 | 0    | Tri a 19.0101  | 0 |
| Ara h 3          | 0 | Che a 1           | 0    | Hev b 8    | 0    | Tri a aA_TI    | 0 |
| V Ara h 3        | 0 | Cla h 8           | 0    | Jug r 1    | 0    | V Tri a 36 191 | 0 |
| Ara h 6          | 0 | Cor a 1.0401      | 0    | Jug r 2    | 0    | V Tri a 36     | 0 |
| V Ara h 6        | 0 | Cor a 8           | 0    | Jug r 3    | 0    | V m43          | 0 |
| Ara h 8          | 0 | Cor a 9           | 0    | Lep d 2    | 0    | V m82          | 0 |
| Ara h 9          | 0 | Cry j 1           | 0    | Mal d 1    | 0    | Serine         | 0 |
| Art v 1          | 0 | Cyn d 1           | 0    | Mer a 1    | 0    | Thioredoxin    | 0 |
| Art v 3          | 0 | Cup a 1           | 0    | Mus m 1    | 0    | Glutathione    | 0 |
| Asp f 1          | 0 | Der f 1           | 0.59 | MUXF3      | 0    | peroxiredoxin  | 0 |
| Asp f 3          | 0 | Der f 2           | 0.89 | Ole e 1    | 0    | Profilin       | 0 |
| Asp f 6          | 0 | Der p 1           | 0.31 | Ole e 7    | 0    | Dehydrin       | 0 |
| Ber e 1          | 0 | Der p 2           | 0.59 | Ole e 9    | 0    | purothionin    | 0 |
| Bet v 1          | 0 | V Der p 4         | 0    | Par j 2    | 0    | LTP            | 0 |
| Bet v 2          | 0 | V Der p 5         | 0    | Pen m 1    | 0    | V Ves v 1      | 0 |
| Bet v 4          | 0 | V Der p 7         | 0    | Pen m 2    | 0.29 | Ves v 5        | 0 |
| Bla g 1          | 0 | Der p 10          | 0    | Pen m 4    | 0    | V Ves v 5      | 0 |
| Bla g 2          | 0 | V Der p 11        | 0    | Phl p 1    | 0.5  | Blank          | 0 |

| Patient no. PA18 |       |                   |      |            |      |                |      |
|------------------|-------|-------------------|------|------------|------|----------------|------|
| Act d 1          | 0     | Bla g 5           | 0    | V Der p 14 | 0    | Phl p 2        | 0    |
| Act d 2          | 0     | Bla g 7           | 0    | V Der p 15 | 0    | Phl p 4        | 0    |
| Act d 5          | 0     | Blo t 5           | 0    | V Der p 18 | 0    | Phl p 5        | 0    |
| Act d 8          | 0     | Bos d 4           | 0    | V Der p 21 | 0    | Phl p 6        | 0    |
| Aln g 1          | 4.75  | V Bos d 4         | 0    | V Der p 23 | 4.57 | Phl p 7        | 0    |
| Alt a 1          | 0     | Bos d 5           | 0    | V clone 16 | 0    | Phl p 11       | 0    |
| Alt a 6          | 0     | V Bos d 5         | 0    | Equ c 1    | 0    | Phl p 12       | 0    |
| Amb a 1          | 0     | Bos d Lactoferrin | 0    | Equ c 3    | 0    | V Pis v 3      | 0    |
| V Ana o 1        | 0     | Bos d 8           | 0    | Fag e 2    | 0    | Pla a 1        | 0    |
| Ana o 2          | 0     | V Bos d 8         | 0    | Fel d 1    | 2.65 | Pla a 2        | 0    |
| V Ana o 2        | 0     | aS1-casein        | 0    | Fel d 2    | 0    | Pla a 3        | 0    |
| V nAna o 2       | 0     | aS2-casein        | 0    | Fel d 4    | 0    | Pla l 1        | 0    |
| V Ana o 3        | 0     | b-casein          | 0    | Gad c 1    | 0    | Pol d 5        | 0    |
| Ani s 1          | 0     | K-casein          | 0    | Gal d 1    | 0    | Pru p 1        | 0.25 |
| Ani s 3          | 0     | Transferrin       | 0    | Gal d 2    | 0    | Pru p 3        | 0    |
| Api g 1          | 0     | Bos d 6           | 0    | Gal d 3    | 0    | V Pru du 3     | 0    |
| Api m 1          | 0     | V BSA             | 0    | Gal d 5    | 0    | V Pru du 4     | 0    |
| V Api m 1        | 0     | Can f 1           | 8.23 | Gly m 4    | 0    | V Pru du 6     | 0    |
| V Api m 2        | 0     | Can f 2           | 0    | Gly m 5    | 0    | V Pru du 6.01  | 0    |
| Api m 4          | 0     | Can f 3           | 0    | Gly m 6    | 0    | V Pru du 6.02  | 0    |
| V Api m 4        | 0     | V Can f 4         | 0    | Hev b 1    | 0    | Sal k 1        | 0    |
| Ara h 1          | 0     | Can f 5           | 2.83 | Hev b 3    | 0    | Ses i 1        | 0    |
| V Ara h 1        | 0     | V Can f 5         | 0    | Hev b 5    | 0    | Tri a 14       | 0    |
| Ara h 2          | 0     | V Can f 6         | 0    | Hev b 6.01 | 0    | Tri a 19.0101  | 0    |
| Ara h 3          | 0     | Che a 1           | 0    | Hev b 8    | 0    | Tri a aA_TI    | 0    |
| V Ara h 3        | 0     | Cla h 8           | 0    | Jug r 1    | 0    | V Tri a 36 191 | 0    |
| Ara h 6          | 0     | Cor a 1.0401      | 0.42 | Jug r 2    | 0    | V Tri a 36     | 0    |
| V Ara h 6        | 0     | Cor a 8           | 0    | Jug r 3    | 0    | V m43          | 0    |
| Ara h 8          | 0     | Cor a 9           | 0    | Lep d 2    | 0    | V m82          | 0    |
| Ara h 9          | 0     | Cry j 1           | 0    | Mal d 1    | 5.04 | Serine         | 0    |
| Art v 1          | 0     | Cyn d 1           | 0.25 | Mer a 1    | 0    | Thioredoxin    | 0    |
| Art v 3          | 0     | Cup a 1           | 0    | Mus m 1    | 0    | Glutathione    | 0    |
| Asp f 1          | 0     | Der f 1           | 3.51 | MUXF3      | 0    | peroxiredoxin  | 0    |
| Asp f 3          | 0     | Der f 2           | 0    | Ole e 1    | 0    | Profilin       | 0    |
| Asp f 6          | 0     | Der p 1           | 0.61 | Ole e 7    | 0    | Dehydrin       | 0    |
| Ber e 1          | 0     | Der p 2           | 0    | Ole e 9    | 0    | purothionin    | 0    |
| Bet v 1          | 64.91 | V Der p 4         | 0    | Par j 2    | 0    | LTP            | 0    |
| Bet v 2          | 0     | V Der p 5         | 0    | Pen m 1    | 0    | V Ves v 1      | 0    |
| Bet v 4          | 0     | V Der p 7         | 0    | Pen m 2    | 0    | Ves v 5        | 0    |
| Bla g 1          | 0     | Der p 10          | 0.26 | Pen m 4    | 0    | V Ves v 5      | 0    |
| Bla g 2          | 0     | V Der p 11        | 0    | Phl p 1    | 0.55 | Blank          | 0    |

| Patient no. PA19 |       |                   |       |            |       |                |       |
|------------------|-------|-------------------|-------|------------|-------|----------------|-------|
| Act d 1          | 0     | Bla g 5           | 0     | V Der p 14 | 0     | Phl p 2        | 13.96 |
| Act d 2          | 0     | Bla g 7           | 0     | V Der p 15 | 0     | Phl p 4        | 0.19  |
| Act d 5          | 0     | Blo t 5           | 0     | V Der p 18 | 0     | Phl p 5        | 54.98 |
| Act d 8          | 0.78  | Bos d 4           | 0     | V Der p 21 | 0     | Phl p 6        | 14.14 |
| Aln g 1          | 4.19  | V Bos d 4         | 0     | V Der p 23 | 24.75 | Phl p 7        | 0.07  |
| Alt a 1          | 2.62  | Bos d 5           | 0     | V clone 16 | 0     | Phl p 11       | 0     |
| Alt a 6          | 0     | V Bos d 5         | 0     | Equ c 1    | 0     | Phl p 12       | 1.13  |
| Amb a 1          | 3.1   | Bos d Lactoferrin | 0     | Equ c 3    | 0     | V Pis v 3      | 0     |
| V Ana o 1        | 0     | Bos d 8           | 0     | Fag e 2    | 0     | Pla a 1        | 0     |
| Ana o 2          | 0     | V Bos d 8         | 0     | Fel d 1    | 0     | Pla a 2        | 0.23  |
| V Ana o 2        | 0     | aS1-casein        | 0     | Fel d 2    | 0     | Pla a 3        | 0     |
| V nAna o 2       | 0     | aS2-casein        | 0     | Fel d 4    | 0     | Pla l 1        | 15.15 |
| V Ana o 3        | 0     | b-casein          | 0     | Gad c 1    | 0     | Pol d 5        | 0     |
| Ani s 1          | 0     | K-casein          | 0     | Gal d 1    | 0     | Pru p 1        | 11.34 |
| Ani s 3          | 0     | Transferrin       | 0     | Gal d 2    | 0     | Pru p 3        | 0     |
| Api g 1          | 2.76  | Bos d 6           | 0     | Gal d 3    | 0     | V Pru du 3     | 0     |
| Api m 1          | 0     | V BSA             | 0     | Gal d 5    | 0     | V Pru du 4     | 6.2   |
| V Api m 1        | 0     | Can f 1           | 0     | Gly m 4    | 1.6   | V Pru du 6     | 0     |
| V Api m 2        | 0     | Can f 2           | 0     | Gly m 5    | 0     | V Pru du 6.01  | 0     |
| Api m 4          | 0     | Can f 3           | 0     | Gly m 6    | 0     | V Pru du 6.02  | 0     |
| V Api m 4        | 0     | V Can f 4         | 0     | Hev b 1    | 0     | Sal k 1        | 0     |
| Ara h 1          | 0     | Can f 5           | 0     | Hev b 3    | 0     | Ses i 1        | 0     |
| V Ara h 1        | 0     | V Can f 5         | 0     | Hev b 5    | 0     | Tri a 14       | 0     |
| Ara h 2          | 0     | V Can f 6         | 0     | Hev b 6.01 | 0     | Tri a 19.0101  | 0     |
| Ara h 3          | 0     | Che a 1           | 0     | Hev b 8    | 9.58  | Tri a aA_TI    | 0     |
| V Ara h 3        | 0     | Cla h 8           | 0     | Jug r 1    | 0.8   | V Tri a 36 191 | 0     |
| Ara h 6          | 0     | Cor a 1.0401      | 2.32  | Jug r 2    | 0.27  | V Tri a 36     | 0     |
| V Ara h 6        | 0     | Cor a 8           | 0     | Jug r 3    | 0     | V m43          | 0     |
| Ara h 8          | 5.75  | Cor a 9           | 0     | Lep d 2    | 0     | V m82          | 0     |
| Ara h 9          | 0     | Cry j 1           | 0.26  | Mal d 1    | 9.36  | Serine         | 0     |
| Art v 1          | 0     | Cyn d 1           | 12.75 | Mer a 1    | 8.34  | Thioredoxin    | 0     |
| Art v 3          | 0     | Cup a 1           | 0.43  | Mus m 1    | 0     | Glutathione    | 0     |
| Asp f 1          | 0     | Der f 1           | 0     | MUXF3      | 0     | peroxiredoxin  | 0     |
| Asp f 3          | 0     | Der f 2           | 56.05 | Ole e 1    | 12.86 | Profilin       | 2.08  |
| Asp f 6          | 0     | Der p 1           | 0     | Ole e 7    | 0     | Dehydrin       | 0     |
| Ber e 1          | 0     | Der p 2           | 37.16 | Ole e 9    | 0     | purothionin    | 0     |
| Bet v 1          | 45.19 | V Der p 4         | 0     | Par j 2    | 0     | LTP            | 0     |
| Bet v 2          | 4.46  | V Der p 5         | 0     | Pen m 1    | 0     | V Ves v 1      | 0     |
| Bet v 4          | 0     | V Der p 7         | 0     | Pen m 2    | 0     | Ves v 5        | 0.11  |
| Bla g 1          | 0     | Der p 10          | 0     | Pen m 4    | 0     | V Ves v 5      | 0     |
| Bla g 2          | 0     | V Der p 11        | 0     | Phl p 1    | 3.62  | Blank          | 0     |

| Patient no. PA20 |   |                   |      |            |      |                |   |
|------------------|---|-------------------|------|------------|------|----------------|---|
| Act d 1          | 0 | Bla g 5           | 0    | V Der p 14 | 0    | Phl p 2        | 0 |
| Act d 2          | 0 | Bla g 7           | 0    | V Der p 15 | 0    | Phl p 4        | 0 |
| Act d 5          | 0 | Blo t 5           | 0    | V Der p 18 | 0    | Phl p 5        | 0 |
| Act d 8          | 0 | Bos d 4           | 0    | V Der p 21 | 0.52 | Phl p 6        | 0 |
| Aln g 1          | 0 | V Bos d 4         | 0    | V Der p 23 | 2.07 | Phl p 7        | 0 |
| Alt a 1          | 0 | Bos d 5           | 0    | V clone 16 | 0    | Phl p 11       | 0 |
| Alt a 6          | 0 | V Bos d 5         | 0    | Equ c 1    | 0    | Phl p 12       | 0 |
| Amb a 1          | 0 | Bos d Lactoferrin | 0    | Equ c 3    | 0    | V Pis v 3      | 0 |
| V Ana o 1        | 0 | Bos d 8           | 0    | Fag e 2    | 0    | Pla a 1        | 0 |
| Ana o 2          | 0 | V Bos d 8         | 0    | Fel d 1    | 0    | Pla a 2        | 0 |
| V Ana o 2        | 0 | aS1-casein        | 0    | Fel d 2    | 0    | Pla a 3        | 0 |
| V nAna o 2       | 0 | aS2-casein        | 0    | Fel d 4    | 0    | Pla l 1        | 0 |
| V Ana o 3        | 0 | b-casein          | 0    | Gad c 1    | 0    | Pol d 5        | 0 |
| Ani s 1          | 0 | K-casein          | 0    | Gal d 1    | 0    | Pru p 1        | 0 |
| Ani s 3          | 0 | Transferrin       | 0    | Gal d 2    | 0    | Pru p 3        | 0 |
| Api g 1          | 0 | Bos d 6           | 0    | Gal d 3    | 0    | V Pru du 3     | 0 |
| Api m 1          | 0 | V BSA             | 0    | Gal d 5    | 0    | V Pru du 4     | 0 |
| V Api m 1        | 0 | Can f 1           | 0    | Gly m 4    | 0    | V Pru du 6     | 0 |
| V Api m 2        | 0 | Can f 2           | 0    | Gly m 5    | 0    | V Pru du 6.01  | 0 |
| Api m 4          | 0 | Can f 3           | 0    | Gly m 6    | 0    | V Pru du 6.02  | 0 |
| V Api m 4        | 0 | V Can f 4         | 0    | Hev b 1    | 0    | Sal k 1        | 0 |
| Ara h 1          | 0 | Can f 5           | 0    | Hev b 3    | 0    | Ses i 1        | 0 |
| V Ara h 1        | 0 | V Can f 5         | 0    | Hev b 5    | 0    | Tri a 14       | 0 |
| Ara h 2          | 0 | V Can f 6         | 0    | Hev b 6.01 | 0    | Tri a 19.0101  | 0 |
| Ara h 3          | 0 | Che a 1           | 0    | Hev b 8    | 0    | Tri a aA_TI    | 0 |
| V Ara h 3        | 0 | Cla h 8           | 0    | Jug r 1    | 0    | V Tri a 36 191 | 0 |
| Ara h 6          | 0 | Cor a 1.0401      | 0    | Jug r 2    | 0    | V Tri a 36     | 0 |
| V Ara h 6        | 0 | Cor a 8           | 0    | Jug r 3    | 0    | V m43          | 0 |
| Ara h 8          | 0 | Cor a 9           | 0    | Lep d 2    | 0    | V m82          | 0 |
| Ara h 9          | 0 | Cry j 1           | 0    | Mal d 1    | 0    | Serine         | 0 |
| Art v 1          | 0 | Cyn d 1           | 0    | Mer a 1    | 0    | Thioredoxin    | 0 |
| Art v 3          | 0 | Cup a 1           | 0    | Mus m 1    | 0    | Glutathione    | 0 |
| Asp f 1          | 0 | Der f 1           | 1.44 | MUXF3      | 0    | peroxiredoxin  | 0 |
| Asp f 3          | 0 | Der f 2           | 3.96 | Ole e 1    | 0    | Profilin       | 0 |
| Asp f 6          | 0 | Der p 1           | 2.02 | Ole e 7    | 0    | Dehydrin       | 0 |
| Ber e 1          | 0 | Der p 2           | 3.65 | Ole e 9    | 0    | purothionin    | 0 |
| Bet v 1          | 0 | V Der p 4         | 0    | Par j 2    | 0    | LTP            | 0 |
| Bet v 2          | 0 | V Der p 5         | 0    | Pen m 1    | 0    | V Ves v 1      | 0 |
| Bet v 4          | 0 | V Der p 7         | 0    | Pen m 2    | 0    | Ves v 5        | 0 |
| Bla g 1          | 0 | Der p 10          | 0.33 | Pen m 4    | 0    | V Ves v 5      | 0 |
| Bla g 2          | 0 | V Der p 11        | 0    | Phl p 1    | 0    | Blank          | 0 |

| Patient no. PA21 |   |                   |       |            |      |                |   |
|------------------|---|-------------------|-------|------------|------|----------------|---|
| Act d 1          | 0 | Bla g 5           | 0     | V Der p 14 | 0    | Phl p 2        | 0 |
| Act d 2          | 0 | Bla g 7           | 0     | V Der p 15 | 0    | Phl p 4        | 0 |
| Act d 5          | 0 | Blo t 5           | 0     | V Der p 18 | 0    | Phl p 5        | 0 |
| Act d 8          | 0 | Bos d 4           | 0     | V Der p 21 | 0    | Phl p 6        | 0 |
| Aln g 1          | 0 | V Bos d 4         | 0     | V Der p 23 | 2.57 | Phl p 7        | 0 |
| Alt a 1          | 0 | Bos d 5           | 0     | V clone 16 | 0    | Phl p 11       | 0 |
| Alt a 6          | 0 | V Bos d 5         | 0     | Equ c 1    | 0    | Phl p 12       | 0 |
| Amb a 1          | 0 | Bos d Lactoferrin | 0     | Equ c 3    | 0    | V Pis v 3      | 0 |
| V Ana o 1        | 0 | Bos d 8           | 0     | Fag e 2    | 0    | Pla a 1        | 0 |
| Ana o 2          | 0 | V Bos d 8         | 0     | Fel d 1    | 0    | Pla a 2        | 0 |
| V Ana o 2        | 0 | aS1-casein        | 0     | Fel d 2    | 0    | Pla a 3        | 0 |
| V nAna o 2       | 0 | aS2-casein        | 0     | Fel d 4    | 0    | Pla l 1        | 0 |
| V Ana o 3        | 0 | b-casein          | 0     | Gad c 1    | 0    | Pol d 5        | 0 |
| Ani s 1          | 0 | K-casein          | 0     | Gal d 1    | 0    | Pru p 1        | 0 |
| Ani s 3          | 0 | Transferrin       | 0     | Gal d 2    | 0    | Pru p 3        | 0 |
| Api g 1          | 0 | Bos d 6           | 0     | Gal d 3    | 0    | V Pru du 3     | 0 |
| Api m 1          | 0 | V BSA             | 0     | Gal d 5    | 0    | V Pru du 4     | 0 |
| V Api m 1        | 0 | Can f 1           | 0     | Gly m 4    | 0    | V Pru du 6     | 0 |
| V Api m 2        | 0 | Can f 2           | 0     | Gly m 5    | 0    | V Pru du 6.01  | 0 |
| Api m 4          | 0 | Can f 3           | 0     | Gly m 6    | 0    | V Pru du 6.02  | 0 |
| V Api m 4        | 0 | V Can f 4         | 0     | Hev b 1    | 0    | Sal k 1        | 0 |
| Ara h 1          | 0 | Can f 5           | 0     | Hev b 3    | 0    | Ses i 1        | 0 |
| V Ara h 1        | 0 | V Can f 5         | 0     | Hev b 5    | 0    | Tri a 14       | 0 |
| Ara h 2          | 0 | V Can f 6         | 0     | Hev b 6.01 | 0    | Tri a 19.0101  | 0 |
| Ara h 3          | 0 | Che a 1           | 0     | Hev b 8    | 0    | Tri a aA_TI    | 0 |
| V Ara h 3        | 0 | Cla h 8           | 0     | Jug r 1    | 0    | V Tri a 36 191 | 0 |
| Ara h 6          | 0 | Cor a 1.0401      | 0     | Jug r 2    | 0.14 | V Tri a 36     | 0 |
| V Ara h 6        | 0 | Cor a 8           | 0     | Jug r 3    | 0    | V m43          | 0 |
| Ara h 8          | 0 | Cor a 9           | 0     | Lep d 2    | 0    | V m82          | 0 |
| Ara h 9          | 0 | Cry j 1           | 0     | Mal d 1    | 0    | Serine         | 0 |
| Art v 1          | 0 | Cyn d 1           | 0.13  | Mer a 1    | 0    | Thioredoxin    | 0 |
| Art v 3          | 0 | Cup a 1           | 0     | Mus m 1    | 0    | Glutathione    | 0 |
| Asp f 1          | 0 | Der f 1           | 0.74  | MUXF3      | 0    | peroxiredoxin  | 0 |
| Asp f 3          | 0 | Der f 2           | 10.84 | Ole e 1    | 0    | Profilin       | 0 |
| Asp f 6          | 0 | Der p 1           | 0.96  | Ole e 7    | 0    | Dehydrin       | 0 |
| Ber e 1          | 0 | Der p 2           | 11.11 | Ole e 9    | 0    | purothionin    | 0 |
| Bet v 1          | 0 | V Der p 4         | 0     | Par j 2    | 0    | LTP            | 0 |
| Bet v 2          | 0 | V Der p 5         | 0     | Pen m 1    | 0    | V Ves v 1      | 0 |
| Bet v 4          | 0 | V Der p 7         | 0     | Pen m 2    | 0    | Ves v 5        | 0 |
| Bla g 1          | 0 | Der p 10          | 0.16  | Pen m 4    | 0    | V Ves v 5      | 0 |
| Bla g 2          | 0 | V Der p 11        | 0     | Phl p 1    | 0    | Blank          | 0 |

| Patient no. PA22 |       |                   |      |            |      |                |      |
|------------------|-------|-------------------|------|------------|------|----------------|------|
| Act d 1          | 0     | Bla g 5           | 0    | V Der p 14 | 0    | Phl p 2        | 6.05 |
| Act d 2          | 0.11  | Bla g 7           | 0    | V Der p 15 | 0    | Phl p 4        | 0.36 |
| Act d 5          | 0     | Blo t 5           | 0    | V Der p 18 | 0    | Phl p 5        | 10.6 |
| Act d 8          | 0     | Bos d 4           | 0    | V Der p 21 | 0    | Phl p 6        | 0.75 |
| Aln g 1          | 1.29  | V Bos d 4         | 0    | V Der p 23 | 1.05 | Phl p 7        | 0    |
| Alt a 1          | 0.62  | Bos d 5           | 0    | V clone 16 | 0    | Phl p 11       | 0    |
| Alt a 6          | 0     | V Bos d 5         | 0    | Equ c 1    | 0    | Phl p 12       | 0    |
| Amb a 1          | 0.48  | Bos d Lactoferrin | 0    | Equ c 3    | 0    | V Pis v 3      | 0    |
| V Ana o 1        | 0     | Bos d 8           | 0    | Fag e 2    | 0    | Pla a 1        | 0    |
| Ana o 2          | 0.79  | V Bos d 8         | 0    | Fel d 1    | 0.52 | Pla a 2        | 0    |
| V Ana o 2        | 0     | aS1-casein        | 0    | Fel d 2    | 0    | Pla a 3        | 0    |
| V nAna o 2       | 0     | aS2-casein        | 0    | Fel d 4    | 0    | Pla l 1        | 0    |
| V Ana o 3        | 0     | b-casein          | 0    | Gad c 1    | 0    | Pol d 5        | 0    |
| Ani s 1          | 0     | K-casein          | 0    | Gal d 1    | 0    | Pru p 1        | 0.09 |
| Ani s 3          | 0     | Transferrin       | 0    | Gal d 2    | 0    | Pru p 3        | 0    |
| Api g 1          | 0     | Bos d 6           | 0    | Gal d 3    | 0    | V Pru du 3     | 0    |
| Api m 1          | 0     | V BSA             | 0    | Gal d 5    | 0    | V Pru du 4     | 0.45 |
| V Api m 1        | 0.34  | Can f 1           | 0    | Gly m 4    | 0.09 | V Pru du 6     | 0    |
| V Api m 2        | 0     | Can f 2           | 0    | Gly m 5    | 0    | V Pru du 6.01  | 0    |
| Api m 4          | 0     | Can f 3           | 0    | Gly m 6    | 0    | V Pru du 6.02  | 0    |
| V Api m 4        | 0     | V Can f 4         | 0    | Hev b 1    | 0    | Sal k 1        | 0    |
| Ara h 1          | 0     | Can f 5           | 0    | Hev b 3    | 0    | Ses i 1        | 0    |
| V Ara h 1        | 0     | V Can f 5         | 0    | Hev b 5    | 0    | Tri a 14       | 0    |
| Ara h 2          | 0     | V Can f 6         | 0    | Hev b 6.01 | 0    | Tri a 19.0101  | 0    |
| Ara h 3          | 0     | Che a 1           | 0    | Hev b 8    | 0.63 | Tri a aA_TI    | 0    |
| V Ara h 3        | 0     | Cla h 8           | 0    | Jug r 1    | 0    | V Tri a 36 191 | 0    |
| Ara h 6          | 0     | Cor a 1.0401      | 2.71 | Jug r 2    | 0.17 | V Tri a 36     | 0    |
| V Ara h 6        | 0     | Cor a 8           | 0    | Jug r 3    | 0    | V m43          | 0    |
| Ara h 8          | 0.07  | Cor a 9           | 0    | Lep d 2    | 0    | V m82          | 0    |
| Ara h 9          | 0     | Cry j 1           | 0    | Mal d 1    | 1.95 | Serine         | 0    |
| Art v 1          | 0.57  | Cyn d 1           | 2.33 | Mer a 1    | 0.69 | Thioredoxin    | 0    |
| Art v 3          | 0     | Cup a 1           | 0    | Mus m 1    | 0    | Glutathione    | 0    |
| Asp f 1          | 0     | Der f 1           | 0    | MUXF3      | 0    | peroxiredoxin  | 0    |
| Asp f 3          | 0     | Der f 2           | 0    | Ole e 1    | 0.26 | Profilin       | 0    |
| Asp f 6          | 0     | Der p 1           | 0    | Ole e 7    | 0    | Dehydrin       | 0    |
| Ber e 1          | 0     | Der p 2           | 0    | Ole e 9    | 0    | purothionin    | 0    |
| Bet v 1          | 17.86 | V Der p 4         | 0    | Par j 2    | 0    | LTP            | 0    |
| Bet v 2          | 0.21  | V Der p 5         | 0    | Pen m 1    | 0    | V Ves v 1      | 0    |
| Bet v 4          | 0     | V Der p 7         | 0    | Pen m 2    | 0    | Ves v 5        | 0    |
| Bla g 1          | 0     | Der p 10          | 0    | Pen m 4    | 0    | V Ves v 5      | 0    |
| Bla g 2          | 0     | V Der p 11        | 0    | Phl p 1    | 0    | Blank          | 0    |

| Patient no. PA23 |      |                   |       |            |       |                |      |
|------------------|------|-------------------|-------|------------|-------|----------------|------|
| Act d 1          | 0    | Bla g 5           | 0     | V Der p 14 | 0     | Phl p 2        | 0    |
| Act d 2          | 0    | Bla g 7           | 0     | V Der p 15 | 0.2   | Phl p 4        | 0    |
| Act d 5          | 0    | Blo t 5           | 0.42  | V Der p 18 | 1.07  | Phl p 5        | 0    |
| Act d 8          | 0    | Bos d 4           | 0     | V Der p 21 | 8.7   | Phl p 6        | 0    |
| Aln g 1          | 0    | V Bos d 4         | 0     | V Der p 23 | 17.93 | Phl p 7        | 0    |
| Alt a 1          | 0    | Bos d 5           | 0     | V clone 16 | 1.78  | Phl p 11       | 0    |
| Alt a 6          | 0    | V Bos d 5         | 0     | Equ c 1    | 0     | Phl p 12       | 0    |
| Amb a 1          | 0    | Bos d Lactoferrin | 0.42  | Equ c 3    | 0     | V Pis v 3      | 0    |
| V Ana o 1        | 0    | Bos d 8           | 0     | Fag e 2    | 0     | Pla a 1        | 0    |
| Ana o 2          | 0    | V Bos d 8         | 0     | Fel d 1    | 0     | Pla a 2        | 0    |
| V Ana o 2        | 0    | aS1-casein        | 0     | Fel d 2    | 0.09  | Pla a 3        | 0    |
| V nAna o 2       | 0    | aS2-casein        | 0.39  | Fel d 4    | 0     | Pla l 1        | 0    |
| V Ana o 3        | 0    | b-casein          | 0     | Gad c 1    | 0     | Pol d 5        | 0.74 |
| Ani s 1          | 0.19 | K-casein          | 0     | Gal d 1    | 0     | Pru p 1        | 0    |
| Ani s 3          | 0    | Transferrin       | 0.24  | Gal d 2    | 0     | Pru p 3        | 0    |
| Api g 1          | 0.91 | Bos d 6           | 0.36  | Gal d 3    | 0     | V Pru du 3     | 0    |
| Api m 1          | 0.45 | V BSA             | 0.34  | Gal d 5    | 0     | V Pru du 4     | 0    |
| V Api m 1        | 0.13 | Can f 1           | 0     | Gly m 4    | 0     | V Pru du 6     | 0    |
| V Api m 2        | 0.28 | Can f 2           | 0     | Gly m 5    | 0     | V Pru du 6.01  | 0    |
| Api m 4          | 0.17 | Can f 3           | 0.1   | Gly m 6    | 0     | V Pru du 6.02  | 0    |
| V Api m 4        | 0    | V Can f 4         | 0     | Hev b 1    | 0     | Sal k 1        | 0.12 |
| Ara h 1          | 0.37 | Can f 5           | 0     | Hev b 3    | 0.36  | Ses i 1        | 0    |
| V Ara h 1        | 0.23 | V Can f 5         | 0     | Hev b 5    | 0.3   | Tri a 14       | 0    |
| Ara h 2          | 0    | V Can f 6         | 0     | Hev b 6.01 | 0.11  | Tri a 19.0101  | 0.15 |
| Ara h 3          | 0    | Che a 1           | 0     | Hev b 8    | 0.21  | Tri a aA_TI    | 0    |
| V Ara h 3        | 0    | Cla h 8           | 0     | Jug r 1    | 0     | V Tri a 36 191 | 0    |
| Ara h 6          | 0    | Cor a 1.0401      | 0     | Jug r 2    | 0     | V Tri a 36     | 0    |
| V Ara h 6        | 0    | Cor a 8           | 0     | Jug r 3    | 0     | V m43          | 0    |
| Ara h 8          | 0    | Cor a 9           | 0     | Lep d 2    | 0     | V m82          | 0    |
| Ara h 9          | 0    | Cry j 1           | 0.13  | Mal d 1    | 0     | Serine         | 0    |
| Art v 1          | 0    | Cyn d 1           | 0.15  | Mer a 1    | 0     | Thioredoxin    | 0    |
| Art v 3          | 0    | Cup a 1           | 0     | Mus m 1    | 0     | Glutathione    | 0    |
| Asp f 1          | 0.15 | Der f 1           | 2.66  | MUXF3      | 0     | peroxiredoxin  | 0    |
| Asp f 3          | 0    | Der f 2           | 16.85 | Ole e 1    | 0     | Profilin       | 0    |
| Asp f 6          | 0    | Der p 1           | 1.76  | Ole e 7    | 0     | Dehydrin       | 0    |
| Ber e 1          | 0    | Der p 2           | 43.63 | Ole e 9    | 0.3   | purothionin    | 0    |
| Bet v 1          | 0    | V Der p 4         | 0     | Par j 2    | 0     | LTP            | 0    |
| Bet v 2          | 0    | V Der p 5         | 29.95 | Pen m 1    | 0     | V Ves v 1      | 0    |
| Bet v 4          | 0    | V Der p 7         | 39.06 | Pen m 2    | 0     | Ves v 5        | 0.11 |
| Bla g 1          | 0    | Der p 10          | 0     | Pen m 4    | 0     | V Ves v 5      | 0    |
| Bla g 2          | 0    | V Der p 11        | 0     | Phl p 1    | 0     | Blank          | 0    |

| Patient no. PA24 |      |                   |      |            |      |                |      |
|------------------|------|-------------------|------|------------|------|----------------|------|
| Act d 1          | 0    | Bla g 5           | 0    | V Der p 14 | 0    | Phl p 2        | 0    |
| Act d 2          | 0.08 | Bla g 7           | 0    | V Der p 15 | 0    | Phl p 4        | 0.33 |
| Act d 5          | 0    | Blo t 5           | 0    | V Der p 18 | 0    | Phl p 5        | 2.69 |
| Act d 8          | 0.15 | Bos d 4           | 0    | V Der p 21 | 2.62 | Phl p 6        | 0.43 |
| Aln g 1          | 0.6  | V Bos d 4         | 0    | V Der p 23 | 3.51 | Phl p 7        | 0    |
| Alt a 1          | 0.27 | Bos d 5           | 0    | V clone 16 | 0    | Phl p 11       | 0    |
| Alt a 6          | 0.42 | V Bos d 5         | 0    | Equ c 1    | 0    | Phl p 12       | 0    |
| Amb a 1          | 0.5  | Bos d Lactoferrin | 0.34 | Equ c 3    | 0    | V Pis v 3      | 0    |
| V Ana o 1        | 0    | Bos d 8           | 0    | Fag e 2    | 0    | Pla a 1        | 0    |
| Ana o 2          | 0    | V Bos d 8         | 0    | Fel d 1    | 0.68 | Pla a 2        | 0    |
| V Ana o 2        | 0    | aS1-casein        | 0    | Fel d 2    | 0.31 | Pla a 3        | 0    |
| V nAna o 2       | 0    | aS2-casein        | 0    | Fel d 4    | 0    | Pla l 1        | 0    |
| V Ana o 3        | 0    | b-casein          | 0    | Gad c 1    | 0    | Pol d 5        | 0    |
| Ani s 1          | 0    | K-casein          | 0    | Gal d 1    | 0    | Pru p 1        | 0.28 |
| Ani s 3          | 0    | Transferrin       | 0.45 | Gal d 2    | 0    | Pru p 3        | 0    |
| Api g 1          | 0    | Bos d 6           | 0    | Gal d 3    | 0    | V Pru du 3     | 0    |
| Api m 1          | 0    | V BSA             | 0    | Gal d 5    | 0    | V Pru du 4     | 0    |
| V Api m 1        | 0.07 | Can f 1           | 0.17 | Gly m 4    | 0.2  | V Pru du 6     | 0    |
| V Api m 2        | 0    | Can f 2           | 0    | Gly m 5    | 0    | V Pru du 6.01  | 0    |
| Api m 4          | 0    | Can f 3           | 0    | Gly m 6    | 0    | V Pru du 6.02  | 0    |
| V Api m 4        | 0    | V Can f 4         | 0    | Hev b 1    | 0    | Sal k 1        | 0    |
| Ara h 1          | 0    | Can f 5           | 0.17 | Hev b 3    | 0    | Ses i 1        | 0    |
| V Ara h 1        | 0    | V Can f 5         | 0    | Hev b 5    | 0    | Tri a 14       | 0    |
| Ara h 2          | 0    | V Can f 6         | 0    | Hev b 6.01 | 0    | Tri a 19.0101  | 0    |
| Ara h 3          | 0    | Che a 1           | 0    | Hev b 8    | 0    | Tri a aA_TI    | 0    |
| V Ara h 3        | 0    | Cla h 8           | 0    | Jug r 1    | 0    | V Tri a 36 191 | 0    |
| Ara h 6          | 0    | Cor a 1.0401      | 1.08 | Jug r 2    | 0.32 | V Tri a 36     | 0    |
| V Ara h 6        | 0    | Cor a 8           | 0    | Jug r 3    | 0    | V m43          | 0    |
| Ara h 8          | 0.55 | Cor a 9           | 0    | Lep d 2    | 0    | V m82          | 0    |
| Ara h 9          | 0    | Cry j 1           | 0    | Mal d 1    | 2.48 | Serine         | 0    |
| Art v 1          | 3.06 | Cyn d 1           | 0.72 | Mer a 1    | 0    | Thioredoxin    | 0    |
| Art v 3          | 0    | Cup a 1           | 0    | Mus m 1    | 0    | Glutathione    | 0    |
| Asp f 1          | 0    | Der f 1           | 0.11 | MUXF3      | 0    | peroxiredoxin  | 0    |
| Asp f 3          | 0    | Der f 2           | 6.5  | Ole e 1    | 7.69 | Profilin       | 0    |
| Asp f 6          | 0    | Der p 1           | 0.41 | Ole e 7    | 0    | Dehydrin       | 0    |
| Ber e 1          | 0    | Der p 2           | 5.34 | Ole e 9    | 0    | purothionin    | 0    |
| Bet v 1          | 8.94 | V Der p 4         | 0    | Par j 2    | 0    | LTP            | 0    |
| Bet v 2          | 0    | V Der p 5         | 3.84 | Pen m 1    | 0    | V Ves v 1      | 0    |
| Bet v 4          | 0    | V Der p 7         | 0.6  | Pen m 2    | 0    | Ves v 5        | 0.42 |
| Bla g 1          | 0    | Der p 10          | 0    | Pen m 4    | 0    | V Ves v 5      | 0    |
| Bla g 2          | 0    | V Der p 11        | 0    | Phl p 1    | 0.75 | Blank          | 0    |



| Patient no. PA25 |   |                   |      |            |      |                |   |
|------------------|---|-------------------|------|------------|------|----------------|---|
| Act d 1          | 0 | Bla g 5           | 0    | V Der p 14 | 0    | Phl p 2        | 0 |
| Act d 2          | 0 | Bla g 7           | 0    | V Der p 15 | 0    | Phl p 4        | 0 |
| Act d 5          | 0 | Blo t 5           | 0    | V Der p 18 | 0    | Phl p 5        | 0 |
| Act d 8          | 0 | Bos d 4           | 0    | V Der p 21 | 0.31 | Phl p 6        | 0 |
| Aln g 1          | 0 | V Bos d 4         | 0    | V Der p 23 | 0.32 | Phl p 7        | 0 |
| Alt a 1          | 0 | Bos d 5           | 0    | V clone 16 | 0.11 | Phl p 11       | 0 |
| Alt a 6          | 0 | V Bos d 5         | 0    | Equ c 1    | 0    | Phl p 12       | 0 |
| Amb a 1          | 0 | Bos d Lactoferrin | 0    | Equ c 3    | 0    | V Pis v 3      | 0 |
| V Ana o 1        | 0 | Bos d 8           | 0    | Fag e 2    | 0    | Pla a 1        | 0 |
| Ana o 2          | 0 | V Bos d 8         | 0    | Fel d 1    | 0    | Pla a 2        | 0 |
| V Ana o 2        | 0 | aS1-casein        | 0    | Fel d 2    | 0    | Pla a 3        | 0 |
| V nAna o 2       | 0 | aS2-casein        | 0    | Fel d 4    | 0    | Pla l 1        | 0 |
| V Ana o 3        | 0 | b-casein          | 0    | Gad c 1    | 0    | Pol d 5        | 0 |
| Ani s 1          | 0 | K-casein          | 0    | Gal d 1    | 0    | Pru p 1        | 0 |
| Ani s 3          | 0 | Transferrin       | 0    | Gal d 2    | 0    | Pru p 3        | 0 |
| Api g 1          | 0 | Bos d 6           | 0    | Gal d 3    | 0    | V Pru du 3     | 0 |
| Api m 1          | 0 | V BSA             | 0    | Gal d 5    | 0    | V Pru du 4     | 0 |
| V Api m 1        | 0 | Can f 1           | 0    | Gly m 4    | 0    | V Pru du 6     | 0 |
| V Api m 2        | 0 | Can f 2           | 0    | Gly m 5    | 0    | V Pru du 6.01  | 0 |
| Api m 4          | 0 | Can f 3           | 0    | Gly m 6    | 0    | V Pru du 6.02  | 0 |
| V Api m 4        | 0 | V Can f 4         | 0    | Hev b 1    | 0    | Sal k 1        | 0 |
| Ara h 1          | 0 | Can f 5           | 0    | Hev b 3    | 0    | Ses i 1        | 0 |
| V Ara h 1        | 0 | V Can f 5         | 0    | Hev b 5    | 0    | Tri a 14       | 0 |
| Ara h 2          | 0 | V Can f 6         | 0    | Hev b 6.01 | 0    | Tri a 19.0101  | 0 |
| Ara h 3          | 0 | Che a 1           | 0    | Hev b 8    | 0    | Tri a aA_TI    | 0 |
| V Ara h 3        | 0 | Cla h 8           | 0    | Jug r 1    | 0    | V Tri a 36 191 | 0 |
| Ara h 6          | 0 | Cor a 1.0401      | 0    | Jug r 2    | 0    | V Tri a 36     | 0 |
| V Ara h 6        | 0 | Cor a 8           | 0    | Jug r 3    | 0    | V m43          | 0 |
| Ara h 8          | 0 | Cor a 9           | 0    | Lep d 2    | 0    | V m82          | 0 |
| Ara h 9          | 0 | Cry j 1           | 0    | Mal d 1    | 0    | Serine         | 0 |
| Art v 1          | 0 | Cyn d 1           | 0    | Mer a 1    | 0    | Thioredoxin    | 0 |
| Art v 3          | 0 | Cup a 1           | 0    | Mus m 1    | 0    | Glutathione    | 0 |
| Asp f 1          | 0 | Der f 1           | 0    | MUXF3      | 0    | peroxiredoxin  | 0 |
| Asp f 3          | 0 | Der f 2           | 0.42 | Ole e 1    | 0    | Profilin       | 0 |
| Asp f 6          | 0 | Der p 1           | 0.25 | Ole e 7    | 0    | Dehydrin       | 0 |
| Ber e 1          | 0 | Der p 2           | 0.41 | Ole e 9    | 0    | purothionin    | 0 |
| Bet v 1          | 0 | V Der p 4         | 0    | Par j 2    | 0    | LTP            | 0 |
| Bet v 2          | 0 | V Der p 5         | 0.46 | Pen m 1    | 0    | V Ves v 1      | 0 |
| Bet v 4          | 0 | V Der p 7         | 0.52 | Pen m 2    | 0    | Ves v 5        | 0 |
| Bla g 1          | 0 | Der p 10          | 0    | Pen m 4    | 0    | V Ves v 5      | 0 |
| Bla g 2          | 0 | V Der p 11        | 0    | Phl p 1    | 0    | Blank          | 0 |

| Patient no. PA26 |   |                   |      |            |      |                |      |
|------------------|---|-------------------|------|------------|------|----------------|------|
| Act d 1          | 0 | Bla g 5           | 0    | V Der p 14 | 0    | Phl p 2        | 0    |
| Act d 2          | 0 | Bla g 7           | 0    | V Der p 15 | 0    | Phl p 4        | 0.56 |
| Act d 5          | 0 | Blo t 5           | 0.81 | V Der p 18 | 0    | Phl p 5        | 5.97 |
| Act d 8          | 0 | Bos d 4           | 0    | V Der p 21 | 0.67 | Phl p 6        | 0    |
| Aln g 1          | 0 | V Bos d 4         | 0    | V Der p 23 | 0.21 | Phl p 7        | 0    |
| Alt a 1          | 0 | Bos d 5           | 0    | V clone 16 | 0    | Phl p 11       | 0    |
| Alt a 6          | 0 | V Bos d 5         | 0    | Equ c 1    | 0    | Phl p 12       | 0    |
| Amb a 1          | 0 | Bos d Lactoferrin | 0    | Equ c 3    | 0    | V Pis v 3      | 0    |
| V Ana o 1        | 0 | Bos d 8           | 0    | Fag e 2    | 0    | Pla a 1        | 0    |
| Ana o 2          | 0 | V Bos d 8         | 0    | Fel d 1    | 1.33 | Pla a 2        | 0    |
| V Ana o 2        | 0 | aS1-casein        | 0    | Fel d 2    | 0    | Pla a 3        | 0    |
| V nAna o 2       | 0 | aS2-casein        | 0    | Fel d 4    | 0    | Pla l 1        | 0    |
| V Ana o 3        | 0 | b-casein          | 0    | Gad c 1    | 0    | Pol d 5        | 0    |
| Ani s 1          | 0 | K-casein          | 0    | Gal d 1    | 0    | Pru p 1        | 0    |
| Ani s 3          | 0 | Transferrin       | 0    | Gal d 2    | 0    | Pru p 3        | 0    |
| Api g 1          | 0 | Bos d 6           | 0    | Gal d 3    | 0    | V Pru du 3     | 0    |
| Api m 1          | 0 | V BSA             | 0    | Gal d 5    | 0    | V Pru du 4     | 0    |
| V Api m 1        | 0 | Can f 1           | 0    | Gly m 4    | 0    | V Pru du 6     | 0    |
| V Api m 2        | 0 | Can f 2           | 0    | Gly m 5    | 0    | V Pru du 6.01  | 0    |
| Api m 4          | 0 | Can f 3           | 0    | Gly m 6    | 0    | V Pru du 6.02  | 0    |
| V Api m 4        | 0 | V Can f 4         | 0    | Hev b 1    | 0    | Sal k 1        | 0    |
| Ara h 1          | 0 | Can f 5           | 0    | Hev b 3    | 0    | Ses i 1        | 0    |
| V Ara h 1        | 0 | V Can f 5         | 0    | Hev b 5    | 0    | Tri a 14       | 0    |
| Ara h 2          | 0 | V Can f 6         | 0    | Hev b 6.01 | 0    | Tri a 19.0101  | 0    |
| Ara h 3          | 0 | Che a 1           | 0    | Hev b 8    | 0    | Tri a aA_TI    | 0    |
| V Ara h 3        | 0 | Cla h 8           | 0    | Jug r 1    | 0    | V Tri a 36 191 | 0    |
| Ara h 6          | 0 | Cor a 1.0401      | 0    | Jug r 2    | 0    | V Tri a 36     | 0    |
| V Ara h 6        | 0 | Cor a 8           | 0    | Jug r 3    | 0    | V m43          | 0    |
| Ara h 8          | 0 | Cor a 9           | 0    | Lep d 2    | 0    | V m82          | 0    |
| Ara h 9          | 0 | Cry j 1           | 0    | Mal d 1    | 0    | Serine         | 0    |
| Art v 1          | 0 | Cyn d 1           | 0    | Mer a 1    | 0    | Thioredoxin    | 0    |
| Art v 3          | 0 | Cup a 1           | 0    | Mus m 1    | 0    | Glutathione    | 0    |
| Asp f 1          | 0 | Der f 1           | 0.33 | MUXF3      | 0    | peroxiredoxin  | 0    |
| Asp f 3          | 0 | Der f 2           | 1.84 | Ole e 1    | 0    | Profilin       | 0    |
| Asp f 6          | 0 | Der p 1           | 0.57 | Ole e 7    | 0    | Dehydrin       | 0    |
| Ber e 1          | 0 | Der p 2           | 2.1  | Ole e 9    | 0    | purothionin    | 0    |
| Bet v 1          | 0 | V Der p 4         | 0    | Par j 2    | 0    | LTP            | 0    |
| Bet v 2          | 0 | V Der p 5         | 2.14 | Pen m 1    | 0    | V Ves v 1      | 0    |
| Bet v 4          | 0 | V Der p 7         | 0.16 | Pen m 2    | 0    | Ves v 5        | 0    |
| Bla g 1          | 0 | Der p 10          | 0    | Pen m 4    | 0    | V Ves v 5      | 0    |
| Bla g 2          | 0 | V Der p 11        | 0    | Phl p 1    | 0    | Blank          | 0    |

| Patient no. PA27 |      |                   |      |            |      |                |   |
|------------------|------|-------------------|------|------------|------|----------------|---|
| Act d 1          | 0    | Bla g 5           | 0    | V Der p 14 | 0    | Phl p 2        | 0 |
| Act d 2          | 0    | Bla g 7           | 0    | V Der p 15 | 0    | Phl p 4        | 0 |
| Act d 5          | 0    | Blo t 5           | 0    | V Der p 18 | 0    | Phl p 5        | 0 |
| Act d 8          | 0    | Bos d 4           | 0    | V Der p 21 | 0    | Phl p 6        | 0 |
| Aln g 1          | 0    | V Bos d 4         | 0    | V Der p 23 | 0.81 | Phl p 7        | 0 |
| Alt a 1          | 0    | Bos d 5           | 0    | V clone 16 | 0    | Phl p 11       | 0 |
| Alt a 6          | 0    | V Bos d 5         | 0    | Equ c 1    | 0    | Phl p 12       | 0 |
| Amb a 1          | 0    | Bos d Lactoferrin | 0    | Equ c 3    | 0    | V Pis v 3      | 0 |
| V Ana o 1        | 0    | Bos d 8           | 0    | Fag e 2    | 0    | Pla a 1        | 0 |
| Ana o 2          | 0    | V Bos d 8         | 0    | Fel d 1    | 0    | Pla a 2        | 0 |
| V Ana o 2        | 0    | aS1-casein        | 0    | Fel d 2    | 0    | Pla a 3        | 0 |
| V nAna o 2       | 0    | aS2-casein        | 0    | Fel d 4    | 0    | Pla l 1        | 0 |
| V Ana o 3        | 0    | b-casein          | 0    | Gad c 1    | 0    | Pol d 5        | 0 |
| Ani s 1          | 0    | K-casein          | 0    | Gal d 1    | 0    | Pru p 1        | 0 |
| Ani s 3          | 0    | Transferrin       | 0    | Gal d 2    | 0    | Pru p 3        | 0 |
| Api g 1          | 0    | Bos d 6           | 0    | Gal d 3    | 0    | V Pru du 3     | 0 |
| Api m 1          | 0    | V BSA             | 0    | Gal d 5    | 0    | V Pru du 4     | 0 |
| V Api m 1        | 0    | Can f 1           | 0    | Gly m 4    | 0    | V Pru du 6     | 0 |
| V Api m 2        | 0    | Can f 2           | 0    | Gly m 5    | 0    | V Pru du 6.01  | 0 |
| Api m 4          | 0    | Can f 3           | 0    | Gly m 6    | 0    | V Pru du 6.02  | 0 |
| V Api m 4        | 0    | V Can f 4         | 0    | Hev b 1    | 0    | Sal k 1        | 0 |
| Ara h 1          | 0    | Can f 5           | 0    | Hev b 3    | 0    | Ses i 1        | 0 |
| V Ara h 1        | 0    | V Can f 5         | 0    | Hev b 5    | 0    | Tri a 14       | 0 |
| Ara h 2          | 0    | V Can f 6         | 0    | Hev b 6.01 | 0    | Tri a 19.0101  | 0 |
| Ara h 3          | 0    | Che a 1           | 0    | Hev b 8    | 0    | Tri a aA_TI    | 0 |
| V Ara h 3        | 0    | Cla h 8           | 0    | Jug r 1    | 0    | V Tri a 36 191 | 0 |
| Ara h 6          | 0    | Cor a 1.0401      | 0.2  | Jug r 2    | 0    | V Tri a 36     | 0 |
| V Ara h 6        | 0    | Cor a 8           | 0    | Jug r 3    | 0    | V m43          | 0 |
| Ara h 8          | 0    | Cor a 9           | 0    | Lep d 2    | 0    | V m82          | 0 |
| Ara h 9          | 0.12 | Cry j 1           | 0    | Mal d 1    | 0.66 | Serine         | 0 |
| Art v 1          | 0    | Cyn d 1           | 0    | Mer a 1    | 0    | Thioredoxin    | 0 |
| Art v 3          | 0    | Cup a 1           | 0    | Mus m 1    | 0    | Glutathione    | 0 |
| Asp f 1          | 0    | Der f 1           | 0.09 | MUXF3      | 0    | peroxiredoxin  | 0 |
| Asp f 3          | 0    | Der f 2           | 0    | Ole e 1    | 2.18 | Profilin       | 0 |
| Asp f 6          | 0    | Der p 1           | 0.31 | Ole e 7    | 0    | Dehydrin       | 0 |
| Ber e 1          | 0    | Der p 2           | 0    | Ole e 9    | 0    | purothionin    | 0 |
| Bet v 1          | 6.54 | V Der p 4         | 0    | Par j 2    | 0    | LTP            | 0 |
| Bet v 2          | 0    | V Der p 5         | 0    | Pen m 1    | 0    | V Ves v 1      | 0 |
| Bet v 4          | 0    | V Der p 7         | 0    | Pen m 2    | 0    | Ves v 5        | 0 |
| Bla g 1          | 0    | Der p 10          | 0    | Pen m 4    | 0    | V Ves v 5      | 0 |
| Bla g 2          | 0    | V Der p 11        | 0    | Phl p 1    | 0    | Blank          | 0 |

| Donor no. NDP1 |      |                   |   |            |      |                |      |
|----------------|------|-------------------|---|------------|------|----------------|------|
| Act d 1        | 0    | Bla g 5           | 0 | V Der p 14 | 0    | Phl p 2        | 0    |
| Act d 2        | 0    | Bla g 7           | 0 | V Der p 15 | 0    | Phl p 4        | 0    |
| Act d 5        | 0    | Blo t 5           | 0 | V Der p 18 | 0    | Phl p 5        | 0    |
| Act d 8        | 0    | Bos d 4           | 0 | V Der p 21 | 0    | Phl p 6        | 0    |
| Aln g 1        | 0    | V Bos d 4         | 0 | V Der p 23 | 0    | Phl p 7        | 0    |
| Alt a 1        | 0    | Bos d 5           | 0 | V clone 16 | 0    | Phl p 11       | 0    |
| Alt a 6        | 0.25 | V Bos d 5         | 0 | Equ c 1    | 0    | Phl p 12       | 0    |
| Amb a 1        | 0    | Bos d Lactoferrin | 0 | Equ c 3    | 0    | V Pis v 3      | 0    |
| V Ana o 1      | 0    | Bos d 8           | 0 | Fag e 2    | 0    | Pla a 1        | 0.56 |
| Ana o 2        | 1.17 | V Bos d 8         | 0 | Fel d 1    | 0    | Pla a 2        | 0    |
| V Ana o 2      | 0    | aS1-casein        | 0 | Fel d 2    | 0    | Pla a 3        | 0    |
| V nAna o 2     | 0    | aS2-casein        | 0 | Fel d 4    | 0    | Pla l 1        | 0    |
| V Ana o 3      | 0    | b-casein          | 0 | Gad c 1    | 0    | Pol d 5        | 0    |
| Ani s 1        | 0    | K-casein          | 0 | Gal d 1    | 0    | Pru p 1        | 0    |
| Ani s 3        | 0    | Transferrin       | 0 | Gal d 2    | 0    | Pru p 3        | 0    |
| Api g 1        | 0    | Bos d 6           | 0 | Gal d 3    | 0    | V Pru du 3     | 0    |
| Api m 1        | 0    | V BSA             | 0 | Gal d 5    | 0.77 | V Pru du 4     | 0    |
| V Api m 1      | 0.48 | Can f 1           | 0 | Gly m 4    | 0    | V Pru du 6     | 0    |
| V Api m 2      | 0    | Can f 2           | 0 | Gly m 5    | 8.09 | V Pru du 6.01  | 0    |
| Api m 4        | 0    | Can f 3           | 0 | Gly m 6    | 0    | V Pru du 6.02  | 0    |
| V Api m 4      | 0    | V Can f 4         | 0 | Hev b 1    | 2.09 | Sal k 1        | 0    |
| Ara h 1        | 0.38 | Can f 5           | 0 | Hev b 3    | 1.08 | Ses i 1        | 0    |
| V Ara h 1      | 0    | V Can f 5         | 0 | Hev b 5    | 0    | Tri a 14       | 0    |
| Ara h 2        | 0    | V Can f 6         | 0 | Hev b 6.01 | 0.17 | Tri a 19.0101  | 0.86 |
| Ara h 3        | 0    | Che a 1           | 0 | Hev b 8    | 0    | Tri a aA_TI    | 0    |
| V Ara h 3      | 0    | Cla h 8           | 0 | Jug r 1    | 0    | V Tri a 36 191 | 0    |
| Ara h 6        | 0    | Cor a 1.0401      | 0 | Jug r 2    | 0    | V Tri a 36     | 0    |
| V Ara h 6      | 0    | Cor a 8           | 0 | Jug r 3    | 0    | V m43          | 0    |
| Ara h 8        | 0    | Cor a 9           | 0 | Lep d 2    | 0    | V m82          | 0    |
| Ara h 9        | 0    | Cry j 1           | 0 | Mal d 1    | 0    | Serine         | 0    |
| Art v 1        | 0    | Cyn d 1           | 0 | Mer a 1    | 0    | Thioredoxin    | 0    |
| Art v 3        | 0    | Cup a 1           | 0 | Mus m 1    | 0    | Glutathione    | 0    |
| Asp f 1        | 0    | Der f 1           | 0 | MUXF3      | 0    | peroxiredoxin  | 0    |
| Asp f 3        | 0    | Der f 2           | 0 | Ole e 1    | 0    | Profilin       | 0    |
| Asp f 6        | 0    | Der p 1           | 0 | Ole e 7    | 0    | Dehydrin       | 0    |
| Ber e 1        | 0    | Der p 2           | 0 | Ole e 9    | 0    | purothionin    | 0    |
| Bet v 1        | 0    | V Der p 4         | 0 | Par j 2    | 0    | LTP            | 0    |
| Bet v 2        | 0    | V Der p 5         | 0 | Pen m 1    | 0    | V Ves v 1      | 0    |
| Bet v 4        | 0    | V Der p 7         | 0 | Pen m 2    | 0    | Ves v 5        | 0.14 |
| Bla g 1        | 0    | Der p 10          | 0 | Pen m 4    | 0.17 | V Ves v 5      | 0    |
| Bla g 2        | 0    | V Der p 11        | 0 | Phl p 1    | 0.81 | Blank          | 0    |

| Donor no. NDP2 |       |                   |       |            |       |                |       |
|----------------|-------|-------------------|-------|------------|-------|----------------|-------|
| Act d 1        | 0     | Bla g 5           | 0     | V Der p 14 | 0     | Phl p 2        | 20.39 |
| Act d 2        | 1.55  | Bla g 7           | 0     | V Der p 15 | 0     | Phl p 4        | 0.33  |
| Act d 5        | 0     | Blo t 5           | 0     | V Der p 18 | 0     | Phl p 5        | 12.91 |
| Act d 8        | 0     | Bos d 4           | 0     | V Der p 21 | 0     | Phl p 6        | 9.73  |
| Aln g 1        | 16.73 | V Bos d 4         | 0     | V Der p 23 | 0     | Phl p 7        | 0     |
| Alt a 1        | 0     | Bos d 5           | 0     | V clone 16 | 0     | Phl p 11       | 0     |
| Alt a 6        | 0     | V Bos d 5         | 0     | Equ c 1    | 62.03 | Phl p 12       | 0     |
| Amb a 1        | 0     | Bos d Lactoferrin | 0     | Equ c 3    | 0.38  | V Pis v 3      | 0     |
| V Ana o 1      | 0     | Bos d 8           | 0     | Fag e 2    | 0     | Pla a 1        | 0     |
| Ana o 2        | 0     | V Bos d 8         | 0     | Fel d 1    | 36.75 | Pla a 2        | 0     |
| V Ana o 2      | 0     | aS1-casein        | 0     | Fel d 2    | 0.33  | Pla a 3        | 0     |
| V nAna o 2     | 0     | aS2-casein        | 0     | Fel d 4    | 27.24 | Pla l 1        | 0     |
| V Ana o 3      | 0     | b-casein          | 0     | Gad c 1    | 0     | Pol d 5        | 0     |
| Ani s 1        | 0     | K-casein          | 0     | Gal d 1    | 0     | Pru p 1        | 1.29  |
| Ani s 3        | 0     | Transferrin       | 0     | Gal d 2    | 0     | Pru p 3        | 0     |
| Api g 1        | 3.27  | Bos d 6           | 0     | Gal d 3    | 0     | V Pru du 3     | 0     |
| Api m 1        | 0     | V BSA             | 0     | Gal d 5    | 0.18  | V Pru du 4     | 0     |
| V Api m 1      | 0     | Can f 1           | 63.36 | Gly m 4    | 0.24  | V Pru du 6     | 0     |
| V Api m 2      | 0     | Can f 2           | 66.45 | Gly m 5    | 0     | V Pru du 6.01  | 0     |
| Api m 4        | 0     | Can f 3           | 0.47  | Gly m 6    | 0     | V Pru du 6.02  | 0     |
| V Api m 4      | 0     | V Can f 4         | 45.75 | Hev b 1    | 0     | Sal k 1        | 0     |
| Ara h 1        | 0     | Can f 5           | 2.78  | Hev b 3    | 0     | Ses i 1        | 0     |
| V Ara h 1      | 0     | V Can f 5         | 0.67  | Hev b 5    | 0     | Tri a 14       | 0     |
| Ara h 2        | 0     | V Can f 6         | 32.3  | Hev b 6.01 | 0     | Tri a 19.0101  | 0     |
| Ara h 3        | 0     | Che a 1           | 0.27  | Hev b 8    | 0.21  | Tri a aA_TI    | 0     |
| V Ara h 3      | 0     | Cla h 8           | 0     | Jug r 1    | 0     | V Tri a 36 191 | 0     |
| Ara h 6        | 0     | Cor a 1.0401      | 9.18  | Jug r 2    | 0.16  | V Tri a 36     | 0     |
| V Ara h 6      | 0     | Cor a 8           | 0     | Jug r 3    | 0     | V m43          | 0     |
| Ara h 8        | 7.78  | Cor a 9           | 0     | Lep d 2    | 0     | V m82          | 0     |
| Ara h 9        | 0     | Cry j 1           | 0.5   | Mal d 1    | 7.25  | Serine         | 0     |
| Art v 1        | 0     | Cyn d 1           | 9.64  | Mer a 1    | 0.21  | Thioredoxin    | 0     |
| Art v 3        | 0     | Cup a 1           | 1.31  | Mus m 1    | 11.67 | Glutathione    | 0     |
| Asp f 1        | 0     | Der f 1           | 0     | MUXF3      | 0     | peroxiredoxin  | 0     |
| Asp f 3        | 0     | Der f 2           | 0     | Ole e 1    | 0.32  | Profilin       | 0     |
| Asp f 6        | 0     | Der p 1           | 0     | Ole e 7    | 0     | Dehydrin       | 0     |
| Ber e 1        | 0     | Der p 2           | 0     | Ole e 9    | 0     | purothionin    | 0     |
| Bet v 1        | 45.02 | V Der p 4         | 0     | Par j 2    | 0     | LTP            | 0     |
| Bet v 2        | 0.24  | V Der p 5         | 0     | Pen m 1    | 0     | V Ves v 1      | 0     |
| Bet v 4        | 0     | V Der p 7         | 0     | Pen m 2    | 0     | Ves v 5        | 0     |
| Bla g 1        | 0     | Der p 10          | 0     | Pen m 4    | 0     | V Ves v 5      | 0     |
| Bla g 2        | 0.17  | V Der p 11        | 0     | Phl p 1    | 25.86 | Blank          | 0     |

| Donor no. NDP3 |   |                   |      |            |      |                |   |
|----------------|---|-------------------|------|------------|------|----------------|---|
| Act d 1        | 0 | Bla g 5           | 0    | V Der p 14 | 0    | Phl p 2        | 0 |
| Act d 2        | 0 | Bla g 7           | 0    | V Der p 15 | 0    | Phl p 4        | 0 |
| Act d 5        | 0 | Blo t 5           | 0    | V Der p 18 | 0    | Phl p 5        | 0 |
| Act d 8        | 0 | Bos d 4           | 0    | V Der p 21 | 0    | Phl p 6        | 0 |
| Aln g 1        | 0 | V Bos d 4         | 0    | V Der p 23 | 0    | Phl p 7        | 0 |
| Alt a 1        | 0 | Bos d 5           | 0    | V clone 16 | 0    | Phl p 11       | 0 |
| Alt a 6        | 0 | V Bos d 5         | 0    | Equ c 1    | 0    | Phl p 12       | 0 |
| Amb a 1        | 0 | Bos d Lactoferrin | 0    | Equ c 3    | 0    | V Pis v 3      | 0 |
| V Ana o 1      | 0 | Bos d 8           | 0    | Fag e 2    | 0    | Pla a 1        | 0 |
| Ana o 2        | 0 | V Bos d 8         | 0    | Fel d 1    | 0.3  | Pla a 2        | 0 |
| V Ana o 2      | 0 | aS1-casein        | 0    | Fel d 2    | 0    | Pla a 3        | 0 |
| V nAna o 2     | 0 | aS2-casein        | 0    | Fel d 4    | 0.15 | Pla l 1        | 0 |
| V Ana o 3      | 0 | b-casein          | 0    | Gad c 1    | 0    | Pol d 5        | 0 |
| Ani s 1        | 0 | K-casein          | 0    | Gal d 1    | 0    | Pru p 1        | 0 |
| Ani s 3        | 0 | Transferrin       | 0.13 | Gal d 2    | 0    | Pru p 3        | 0 |
| Api g 1        | 0 | Bos d 6           | 0    | Gal d 3    | 0    | V Pru du 3     | 0 |
| Api m 1        | 0 | V BSA             | 0    | Gal d 5    | 0    | V Pru du 4     | 0 |
| V Api m 1      | 0 | Can f 1           | 0.3  | Gly m 4    | 0    | V Pru du 6     | 0 |
| V Api m 2      | 0 | Can f 2           | 0    | Gly m 5    | 0    | V Pru du 6.01  | 0 |
| Api m 4        | 0 | Can f 3           | 0    | Gly m 6    | 0    | V Pru du 6.02  | 0 |
| V Api m 4      | 0 | V Can f 4         | 0    | Hev b 1    | 0    | Sal k 1        | 0 |
| Ara h 1        | 0 | Can f 5           | 0    | Hev b 3    | 0    | Ses i 1        | 0 |
| V Ara h 1      | 0 | V Can f 5         | 0    | Hev b 5    | 0    | Tri a 14       | 0 |
| Ara h 2        | 0 | V Can f 6         | 0    | Hev b 6.01 | 0    | Tri a 19.0101  | 0 |
| Ara h 3        | 0 | Che a 1           | 0    | Hev b 8    | 0    | Tri a aA_TI    | 0 |
| V Ara h 3      | 0 | Cla h 8           | 0    | Jug r 1    | 0    | V Tri a 36 191 | 0 |
| Ara h 6        | 0 | Cor a 1.0401      | 0    | Jug r 2    | 0    | V Tri a 36     | 0 |
| V Ara h 6      | 0 | Cor a 8           | 0    | Jug r 3    | 0    | V m43          | 0 |
| Ara h 8        | 0 | Cor a 9           | 0    | Lep d 2    | 0    | V m82          | 0 |
| Ara h 9        | 0 | Cry j 1           | 0    | Mal d 1    | 0    | Serine         | 0 |
| Art v 1        | 0 | Cyn d 1           | 0    | Mer a 1    | 0    | Thioredoxin    | 0 |
| Art v 3        | 0 | Cup a 1           | 0    | Mus m 1    | 0    | Glutathione    | 0 |
| Asp f 1        | 0 | Der f 1           | 0    | MUXF3      | 0    | peroxiredoxin  | 0 |
| Asp f 3        | 0 | Der f 2           | 0    | Ole e 1    | 0    | Profilin       | 0 |
| Asp f 6        | 0 | Der p 1           | 0    | Ole e 7    | 0    | Dehydrin       | 0 |
| Ber e 1        | 0 | Der p 2           | 0    | Ole e 9    | 0    | purothionin    | 0 |
| Bet v 1        | 0 | V Der p 4         | 0    | Par j 2    | 0    | LTP            | 0 |
| Bet v 2        | 0 | V Der p 5         | 0    | Pen m 1    | 0    | V Ves v 1      | 0 |
| Bet v 4        | 0 | V Der p 7         | 0    | Pen m 2    | 0    | Ves v 5        | 0 |
| Bla g 1        | 0 | Der p 10          | 0    | Pen m 4    | 0    | V Ves v 5      | 0 |
| Bla g 2        | 0 | V Der p 11        | 0    | Phl p 1    | 0    | Blank          | 0 |

| Donor no. NDP4 |      |                   |   |            |      |                |   |
|----------------|------|-------------------|---|------------|------|----------------|---|
| Act d 1        | 0    | Bla g 5           | 0 | V Der p 14 | 0    | Phl p 2        | 0 |
| Act d 2        | 0    | Bla g 7           | 0 | V Der p 15 | 0    | Phl p 4        | 0 |
| Act d 5        | 0    | Blo t 5           | 0 | V Der p 18 | 0    | Phl p 5        | 0 |
| Act d 8        | 0    | Bos d 4           | 0 | V Der p 21 | 0    | Phl p 6        | 0 |
| Aln g 1        | 0    | V Bos d 4         | 0 | V Der p 23 | 0    | Phl p 7        | 0 |
| Alt a 1        | 0.79 | Bos d 5           | 0 | V clone 16 | 0    | Phl p 11       | 0 |
| Alt a 6        | 0    | V Bos d 5         | 0 | Equ c 1    | 0    | Phl p 12       | 0 |
| Amb a 1        | 0    | Bos d Lactoferrin | 0 | Equ c 3    | 0    | V Pis v 3      | 0 |
| V Ana o 1      | 0    | Bos d 8           | 0 | Fag e 2    | 0    | Pla a 1        | 0 |
| Ana o 2        | 0    | V Bos d 8         | 0 | Fel d 1    | 2.27 | Pla a 2        | 0 |
| V Ana o 2      | 0    | aS1-casein        | 0 | Fel d 2    | 0    | Pla a 3        | 0 |
| V nAna o 2     | 0    | aS2-casein        | 0 | Fel d 4    | 0    | Pla l 1        | 0 |
| V Ana o 3      | 0    | b-casein          | 0 | Gad c 1    | 0    | Pol d 5        | 0 |
| Ani s 1        | 0    | K-casein          | 0 | Gal d 1    | 0    | Pru p 1        | 0 |
| Ani s 3        | 0    | Transferrin       | 0 | Gal d 2    | 0    | Pru p 3        | 0 |
| Api g 1        | 0    | Bos d 6           | 0 | Gal d 3    | 0    | V Pru du 3     | 0 |
| Api m 1        | 0    | V BSA             | 0 | Gal d 5    | 0    | V Pru du 4     | 0 |
| V Api m 1      | 0    | Can f 1           | 0 | Gly m 4    | 0    | V Pru du 6     | 0 |
| V Api m 2      | 0    | Can f 2           | 0 | Gly m 5    | 0    | V Pru du 6.01  | 0 |
| Api m 4        | 0    | Can f 3           | 0 | Gly m 6    | 0    | V Pru du 6.02  | 0 |
| V Api m 4      | 0    | V Can f 4         | 0 | Hev b 1    | 0    | Sal k 1        | 0 |
| Ara h 1        | 0    | Can f 5           | 0 | Hev b 3    | 0    | Ses i 1        | 0 |
| V Ara h 1      | 0    | V Can f 5         | 0 | Hev b 5    | 0    | Tri a 14       | 0 |
| Ara h 2        | 0    | V Can f 6         | 0 | Hev b 6.01 | 0    | Tri a 19.0101  | 0 |
| Ara h 3        | 0    | Che a 1           | 0 | Hev b 8    | 0    | Tri a aA_TI    | 0 |
| V Ara h 3      | 0    | Cla h 8           | 0 | Jug r 1    | 0    | V Tri a 36 191 | 0 |
| Ara h 6        | 0    | Cor a 1.0401      | 0 | Jug r 2    | 0    | V Tri a 36     | 0 |
| V Ara h 6      | 0    | Cor a 8           | 0 | Jug r 3    | 0    | V m43          | 0 |
| Ara h 8        | 0    | Cor a 9           | 0 | Lep d 2    | 0    | V m82          | 0 |
| Ara h 9        | 0    | Cry j 1           | 0 | Mal d 1    | 0    | Serine         | 0 |
| Art v 1        | 0    | Cyn d 1           | 0 | Mer a 1    | 0    | Thioredoxin    | 0 |
| Art v 3        | 0    | Cup a 1           | 0 | Mus m 1    | 0    | Glutathione    | 0 |
| Asp f 1        | 0    | Der f 1           | 0 | MUXF3      | 0    | peroxiredoxin  | 0 |
| Asp f 3        | 0    | Der f 2           | 0 | Ole e 1    | 0.25 | Profilin       | 0 |
| Asp f 6        | 0    | Der p 1           | 0 | Ole e 7    | 0    | Dehydrin       | 0 |
| Ber e 1        | 0    | Der p 2           | 0 | Ole e 9    | 0    | purothionin    | 0 |
| Bet v 1        | 0    | V Der p 4         | 0 | Par j 2    | 0    | LTP            | 0 |
| Bet v 2        | 0    | V Der p 5         | 0 | Pen m 1    | 0    | V Ves v 1      | 0 |
| Bet v 4        | 0    | V Der p 7         | 0 | Pen m 2    | 0    | Ves v 5        | 0 |
| Bla g 1        | 0    | Der p 10          | 0 | Pen m 4    | 0    | V Ves v 5      | 0 |
| Bla g 2        | 0    | V Der p 11        | 0 | Phl p 1    | 0    | Blank          | 0 |

| Donor no. NDP5 |       |                   |      |            |      |                |      |
|----------------|-------|-------------------|------|------------|------|----------------|------|
| Act d 1        | 0     | Bla g 5           | 0    | V Der p 14 | 0    | Phl p 2        | 0    |
| Act d 2        | 0     | Bla g 7           | 0    | V Der p 15 | 0    | Phl p 4        | 0    |
| Act d 5        | 0     | Blo t 5           | 0    | V Der p 18 | 0    | Phl p 5        | 1.56 |
| Act d 8        | 0     | Bos d 4           | 0    | V Der p 21 | 0    | Phl p 6        | 0    |
| Aln g 1        | 5.8   | V Bos d 4         | 0    | V Der p 23 | 0    | Phl p 7        | 0    |
| Alt a 1        | 0     | Bos d 5           | 0    | V clone 16 | 0    | Phl p 11       | 0    |
| Alt a 6        | 0     | V Bos d 5         | 0    | Equ c 1    | 0    | Phl p 12       | 0    |
| Amb a 1        | 1.67  | Bos d Lactoferrin | 0    | Equ c 3    | 0    | V Pis v 3      | 0.35 |
| V Ana o 1      | 0     | Bos d 8           | 0    | Fag e 2    | 0    | Pla a 1        | 0    |
| Ana o 2        | 12.79 | V Bos d 8         | 0    | Fel d 1    | 0    | Pla a 2        | 0    |
| V Ana o 2      | 0     | aS1-casein        | 0    | Fel d 2    | 0    | Pla a 3        | 0    |
| V nAna o 2     | 0     | aS2-casein        | 0    | Fel d 4    | 0    | Pla l 1        | 0    |
| V Ana o 3      | 0     | b-casein          | 0    | Gad c 1    | 0    | Pol d 5        | 0    |
| Ani s 1        | 0     | K-casein          | 0    | Gal d 1    | 0    | Pru p 1        | 0.16 |
| Ani s 3        | 0     | Transferrin       | 0    | Gal d 2    | 0    | Pru p 3        | 0    |
| Api g 1        | 0.95  | Bos d 6           | 0    | Gal d 3    | 0    | V Pru du 3     | 0    |
| Api m 1        | 0     | V BSA             | 0    | Gal d 5    | 0    | V Pru du 4     | 3.7  |
| V Api m 1      | 0     | Can f 1           | 0    | Gly m 4    | 0.95 | V Pru du 6     | 0    |
| V Api m 2      | 0     | Can f 2           | 0    | Gly m 5    | 0    | V Pru du 6.01  | 0    |
| Api m 4        | 0     | Can f 3           | 0    | Gly m 6    | 0    | V Pru du 6.02  | 0    |
| V Api m 4      | 0     | V Can f 4         | 0    | Hev b 1    | 0    | Sal k 1        | 0    |
| Ara h 1        | 0     | Can f 5           | 0    | Hev b 3    | 0    | Ses i 1        | 0    |
| V Ara h 1      | 0     | V Can f 5         | 0    | Hev b 5    | 0    | Tri a 14       | 0    |
| Ara h 2        | 0     | V Can f 6         | 0    | Hev b 6.01 | 0    | Tri a 19.0101  | 0    |
| Ara h 3        | 0     | Che a 1           | 0    | Hev b 8    | 3.21 | Tri a aA_TI    | 0    |
| V Ara h 3      | 0     | Cla h 8           | 0    | Jug r 1    | 0    | V Tri a 36 191 | 0    |
| Ara h 6        | 0     | Cor a 1.0401      | 3.27 | Jug r 2    | 0    | V Tri a 36     | 0    |
| V Ara h 6      | 0     | Cor a 8           | 0    | Jug r 3    | 0    | V m43          | 0    |
| Ara h 8        | 0.34  | Cor a 9           | 0    | Lep d 2    | 0    | V m82          | 0    |
| Ara h 9        | 0     | Cry j 1           | 0.14 | Mal d 1    | 3.46 | Serine         | 0    |
| Art v 1        | 0     | Cyn d 1           | 0.4  | Mer a 1    | 0.42 | Thioredoxin    | 0    |
| Art v 3        | 0     | Cup a 1           | 0    | Mus m 1    | 0    | Glutathione    | 0    |
| Asp f 1        | 0     | Der f 1           | 0    | MUXF3      | 0    | peroxiredoxin  | 0    |
| Asp f 3        | 0     | Der f 2           | 0    | Ole e 1    | 0    | Profilin       | 0.2  |
| Asp f 6        | 0     | Der p 1           | 0    | Ole e 7    | 0    | Dehydrin       | 0    |
| Ber e 1        | 0     | Der p 2           | 0    | Ole e 9    | 0    | purothionin    | 0    |
| Bet v 1        | 22.63 | V Der p 4         | 0    | Par j 2    | 0    | LTP            | 0    |
| Bet v 2        | 0.41  | V Der p 5         | 0    | Pen m 1    | 0    | V Ves v 1      | 0    |
| Bet v 4        | 0     | V Der p 7         | 0    | Pen m 2    | 0    | Ves v 5        | 0.45 |
| Bla g 1        | 0     | Der p 10          | 0    | Pen m 4    | 0    | V Ves v 5      | 0    |
| Bla g 2        | 0     | V Der p 11        | 0    | Phl p 1    | 0    | Blank          | 0    |



| Donor no. NA1 |      |                   |   |            |      |                |      |
|---------------|------|-------------------|---|------------|------|----------------|------|
| Act d 1       | 0    | Bla g 5           | 0 | V Der p 14 | 0    | Phl p 2        | 0    |
| Act d 2       | 0    | Bla g 7           | 0 | V Der p 15 | 0    | Phl p 4        | 0    |
| Act d 5       | 0    | Blo t 5           | 0 | V Der p 18 | 0    | Phl p 5        | 0    |
| Act d 8       | 0    | Bos d 4           | 0 | V Der p 21 | 0    | Phl p 6        | 0    |
| Aln g 1       | 0    | V Bos d 4         | 0 | V Der p 23 | 0    | Phl p 7        | 0    |
| Alt a 1       | 0    | Bos d 5           | 0 | V clone 16 | 0    | Phl p 11       | 0    |
| Alt a 6       | 0    | V Bos d 5         | 0 | Equ c 1    | 0    | Phl p 12       | 0    |
| Amb a 1       | 0    | Bos d Lactoferrin | 0 | Equ c 3    | 0    | V Pis v 3      | 0    |
| V Ana o 1     | 0    | Bos d 8           | 0 | Fag e 2    | 0    | Pla a 1        | 0.21 |
| Ana o 2       | 0.25 | V Bos d 8         | 0 | Fel d 1    | 0    | Pla a 2        | 0    |
| V Ana o 2     | 0    | aS1-casein        | 0 | Fel d 2    | 0    | Pla a 3        | 0    |
| V nAna o 2    | 0    | aS2-casein        | 0 | Fel d 4    | 0.02 | Pla l 1        | 0    |
| V Ana o 3     | 0    | b-casein          | 0 | Gad c 1    | 0.24 | Pol d 5        | 0    |
| Ani s 1       | 0    | K-casein          | 0 | Gal d 1    | 0    | Pru p 1        | 0    |
| Ani s 3       | 0    | Transferrin       | 0 | Gal d 2    | 0    | Pru p 3        | 0    |
| Api g 1       | 0    | Bos d 6           | 0 | Gal d 3    | 0    | V Pru du 3     | 0    |
| Api m 1       | 0    | V BSA             | 0 | Gal d 5    | 0    | V Pru du 4     | 0    |
| V Api m 1     | 0    | Can f 1           | 0 | Gly m 4    | 0    | V Pru du 6     | 0    |
| V Api m 2     | 0    | Can f 2           | 0 | Gly m 5    | 0    | V Pru du 6.01  | 0    |
| Api m 4       | 0    | Can f 3           | 0 | Gly m 6    | 0    | V Pru du 6.02  | 0    |
| V Api m 4     | 0    | V Can f 4         | 0 | Hev b 1    | 0    | Sal k 1        | 0    |
| Ara h 1       | 0    | Can f 5           | 0 | Hev b 3    | 0    | Ses i 1        | 0    |
| V Ara h 1     | 0    | V Can f 5         | 0 | Hev b 5    | 0    | Tri a 14       | 0    |
| Ara h 2       | 0    | V Can f 6         | 0 | Hev b 6.01 | 0    | Tri a 19.0101  | 0    |
| Ara h 3       | 0    | Che a 1           | 0 | Hev b 8    | 0    | Tri a aA_TI    | 0    |
| V Ara h 3     | 0    | Cla h 8           | 0 | Jug r 1    | 0    | V Tri a 36 191 | 0    |
| Ara h 6       | 0    | Cor a 1.0401      | 0 | Jug r 2    | 0    | V Tri a 36     | 0    |
| V Ara h 6     | 0    | Cor a 8           | 0 | Jug r 3    | 0    | V m43          | 0    |
| Ara h 8       | 0    | Cor a 9           | 0 | Lep d 2    | 0    | V m82          | 0    |
| Ara h 9       | 0    | Cry j 1           | 0 | Mal d 1    | 0    | Serine         | 0    |
| Art v 1       | 0    | Cyn d 1           | 0 | Mer a 1    | 0    | Thioredoxin    | 0    |
| Art v 3       | 0    | Cup a 1           | 0 | Mus m 1    | 0    | Glutathione    | 0    |
| Asp f 1       | 0    | Der f 1           | 0 | MUXF3      | 0    | peroxiredoxin  | 0    |
| Asp f 3       | 0    | Der f 2           | 0 | Ole e 1    | 0    | Profilin       | 0    |
| Asp f 6       | 0    | Der p 1           | 0 | Ole e 7    | 0    | Dehydrin       | 0    |
| Ber e 1       | 0    | Der p 2           | 0 | Ole e 9    | 0    | purothionin    | 0    |
| Bet v 1       | 0    | V Der p 4         | 0 | Par j 2    | 0    | LTP            | 0    |
| Bet v 2       | 0    | V Der p 5         | 0 | Pen m 1    | 0    | V Ves v 1      | 0    |
| Bet v 4       | 0    | V Der p 7         | 0 | Pen m 2    | 0    | Ves v 5        | 0    |
| Bla g 1       | 0    | Der p 10          | 0 | Pen m 4    | 0    | V Ves v 5      | 0    |
| Bla g 2       | 0    | V Der p 11        | 0 | Phl p 1    | 0.16 | Blank          | 0    |

| Donor no. NA2 |      |                   |   |            |      |                |      |
|---------------|------|-------------------|---|------------|------|----------------|------|
| Act d 1       | 0    | Bla g 5           | 0 | V Der p 14 | 0    | Phl p 2        | 0    |
| Act d 2       | 0    | Bla g 7           | 0 | V Der p 15 | 0    | Phl p 4        | 0    |
| Act d 5       | 0    | Blo t 5           | 0 | V Der p 18 | 0    | Phl p 5        | 0    |
| Act d 8       | 0    | Bos d 4           | 0 | V Der p 21 | 0    | Phl p 6        | 0    |
| Aln g 1       | 0    | V Bos d 4         | 0 | V Der p 23 | 0    | Phl p 7        | 0    |
| Alt a 1       | 0    | Bos d 5           | 0 | V clone 16 | 0    | Phl p 11       | 0    |
| Alt a 6       | 0    | V Bos d 5         | 0 | Equ c 1    | 0    | Phl p 12       | 0    |
| Amb a 1       | 0    | Bos d Lactoferrin | 0 | Equ c 3    | 0    | V Pis v 3      | 0    |
| V Ana o 1     | 0    | Bos d 8           | 0 | Fag e 2    | 0    | Pla a 1        | 0    |
| Ana o 2       | 0    | V Bos d 8         | 0 | Fel d 1    | 0    | Pla a 2        | 0    |
| V Ana o 2     | 0    | aS1-casein        | 0 | Fel d 2    | 0    | Pla a 3        | 0    |
| V nAna o 2    | 0    | aS2-casein        | 0 | Fel d 4    | 0    | Pla l 1        | 0    |
| V Ana o 3     | 0    | b-casein          | 0 | Gad c 1    | 0    | Pol d 5        | 0    |
| Ani s 1       | 0    | K-casein          | 0 | Gal d 1    | 0    | Pru p 1        | 0    |
| Ani s 3       | 0    | Transferrin       | 0 | Gal d 2    | 0    | Pru p 3        | 0    |
| Api g 1       | 0    | Bos d 6           | 0 | Gal d 3    | 0    | V Pru du 3     | 0    |
| Api m 1       | 0.44 | V BSA             | 0 | Gal d 5    | 0    | V Pru du 4     | 0    |
| V Api m 1     | 0    | Can f 1           | 0 | Gly m 4    | 0    | V Pru du 6     | 0    |
| V Api m 2     | 0    | Can f 2           | 0 | Gly m 5    | 0.39 | V Pru du 6.01  | 0    |
| Api m 4       | 0    | Can f 3           | 0 | Gly m 6    | 0    | V Pru du 6.02  | 0    |
| V Api m 4     | 0    | V Can f 4         | 0 | Hev b 1    | 0.24 | Sal k 1        | 0    |
| Ara h 1       | 0    | Can f 5           | 0 | Hev b 3    | 0    | Ses i 1        | 0    |
| V Ara h 1     | 0    | V Can f 5         | 0 | Hev b 5    | 0    | Tri a 14       | 0    |
| Ara h 2       | 0    | V Can f 6         | 0 | Hev b 6.01 | 0    | Tri a 19.0101  | 0.43 |
| Ara h 3       | 0    | Che a 1           | 0 | Hev b 8    | 0    | Tri a aA_TI    | 0    |
| V Ara h 3     | 0    | Cla h 8           | 0 | Jug r 1    | 0    | V Tri a 36 191 | 0    |
| Ara h 6       | 0    | Cor a 1.0401      | 0 | Jug r 2    | 0    | V Tri a 36     | 0    |
| V Ara h 6     | 0    | Cor a 8           | 0 | Jug r 3    | 0    | V m43          | 0    |
| Ara h 8       | 0    | Cor a 9           | 0 | Lep d 2    | 0    | V m82          | 0    |
| Ara h 9       | 0    | Cry j 1           | 0 | Mal d 1    | 0    | Serine         | 0    |
| Art v 1       | 0    | Cyn d 1           | 0 | Mer a 1    | 0    | Thioredoxin    | 0    |
| Art v 3       | 0    | Cup a 1           | 0 | Mus m 1    | 0    | Glutathione    | 0    |
| Asp f 1       | 0    | Der f 1           | 0 | MUXF3      | 0    | peroxiredoxin  | 0    |
| Asp f 3       | 0    | Der f 2           | 0 | Ole e 1    | 0    | Profilin       | 0.27 |
| Asp f 6       | 0    | Der p 1           | 0 | Ole e 7    | 0    | Dehydrin       | 0    |
| Ber e 1       | 0    | Der p 2           | 0 | Ole e 9    | 0    | purothionin    | 0    |
| Bet v 1       | 0    | V Der p 4         | 0 | Par j 2    | 0    | LTP            | 0    |
| Bet v 2       | 0    | V Der p 5         | 0 | Pen m 1    | 0    | V Ves v 1      | 0    |
| Bet v 4       | 0    | V Der p 7         | 0 | Pen m 2    | 0    | Ves v 5        | 0    |
| Bla g 1       | 0    | Der p 10          | 0 | Pen m 4    | 0    | V Ves v 5      | 0    |
| Bla g 2       | 0    | V Der p 11        | 0 | Phl p 1    | 0.25 | Blank          | 0    |

| Donor no. NA3 |   |                   |   |            |   |                |   |
|---------------|---|-------------------|---|------------|---|----------------|---|
| Act d 1       | 0 | Bla g 5           | 0 | V Der p 14 | 0 | Phl p 2        | 0 |
| Act d 2       | 0 | Bla g 7           | 0 | V Der p 15 | 0 | Phl p 4        | 0 |
| Act d 5       | 0 | Blo t 5           | 0 | V Der p 18 | 0 | Phl p 5        | 0 |
| Act d 8       | 0 | Bos d 4           | 0 | V Der p 21 | 0 | Phl p 6        | 0 |
| Aln g 1       | 0 | V Bos d 4         | 0 | V Der p 23 | 0 | Phl p 7        | 0 |
| Alt a 1       | 0 | Bos d 5           | 0 | V clone 16 | 0 | Phl p 11       | 0 |
| Alt a 6       | 0 | V Bos d 5         | 0 | Equ c 1    | 0 | Phl p 12       | 0 |
| Amb a 1       | 0 | Bos d Lactoferrin | 0 | Equ c 3    | 0 | V Pis v 3      | 0 |
| V Ana o 1     | 0 | Bos d 8           | 0 | Fag e 2    | 0 | Pla a 1        | 0 |
| Ana o 2       | 0 | V Bos d 8         | 0 | Fel d 1    | 0 | Pla a 2        | 0 |
| V Ana o 2     | 0 | aS1-casein        | 0 | Fel d 2    | 0 | Pla a 3        | 0 |
| V nAna o 2    | 0 | aS2-casein        | 0 | Fel d 4    | 0 | Pla l 1        | 0 |
| V Ana o 3     | 0 | b-casein          | 0 | Gad c 1    | 0 | Pol d 5        | 0 |
| Ani s 1       | 0 | K-casein          | 0 | Gal d 1    | 0 | Pru p 1        | 0 |
| Ani s 3       | 0 | Transferrin       | 0 | Gal d 2    | 0 | Pru p 3        | 0 |
| Api g 1       | 0 | Bos d 6           | 0 | Gal d 3    | 0 | V Pru du 3     | 0 |
| Api m 1       | 0 | V BSA             | 0 | Gal d 5    | 0 | V Pru du 4     | 0 |
| V Api m 1     | 0 | Can f 1           | 0 | Gly m 4    | 0 | V Pru du 6     | 0 |
| V Api m 2     | 0 | Can f 2           | 0 | Gly m 5    | 0 | V Pru du 6.01  | 0 |
| Api m 4       | 0 | Can f 3           | 0 | Gly m 6    | 0 | V Pru du 6.02  | 0 |
| V Api m 4     | 0 | V Can f 4         | 0 | Hev b 1    | 0 | Sal k 1        | 0 |
| Ara h 1       | 0 | Can f 5           | 0 | Hev b 3    | 0 | Ses i 1        | 0 |
| V Ara h 1     | 0 | V Can f 5         | 0 | Hev b 5    | 0 | Tri a 14       | 0 |
| Ara h 2       | 0 | V Can f 6         | 0 | Hev b 6.01 | 0 | Tri a 19.0101  | 0 |
| Ara h 3       | 0 | Che a 1           | 0 | Hev b 8    | 0 | Tri a aA_TI    | 0 |
| V Ara h 3     | 0 | Cla h 8           | 0 | Jug r 1    | 0 | V Tri a 36 191 | 0 |
| Ara h 6       | 0 | Cor a 1.0401      | 0 | Jug r 2    | 0 | V Tri a 36     | 0 |
| V Ara h 6     | 0 | Cor a 8           | 0 | Jug r 3    | 0 | V m43          | 0 |
| Ara h 8       | 0 | Cor a 9           | 0 | Lep d 2    | 0 | V m82          | 0 |
| Ara h 9       | 0 | Cry j 1           | 0 | Mal d 1    | 0 | Serine         | 0 |
| Art v 1       | 0 | Cyn d 1           | 0 | Mer a 1    | 0 | Thioredoxin    | 0 |
| Art v 3       | 0 | Cup a 1           | 0 | Mus m 1    | 0 | Glutathione    | 0 |
| Asp f 1       | 0 | Der f 1           | 0 | MUXF3      | 0 | peroxiredoxin  | 0 |
| Asp f 3       | 0 | Der f 2           | 0 | Ole e 1    | 0 | Profilin       | 0 |
| Asp f 6       | 0 | Der p 1           | 0 | Ole e 7    | 0 | Dehydrin       | 0 |
| Ber e 1       | 0 | Der p 2           | 0 | Ole e 9    | 0 | purothionin    | 0 |
| Bet v 1       | 0 | V Der p 4         | 0 | Par j 2    | 0 | LTP            | 0 |
| Bet v 2       | 0 | V Der p 5         | 0 | Pen m 1    | 0 | V Ves v 1      | 0 |
| Bet v 4       | 0 | V Der p 7         | 0 | Pen m 2    | 0 | Ves v 5        | 0 |
| Bla g 1       | 0 | Der p 10          | 0 | Pen m 4    | 0 | V Ves v 5      | 0 |
| Bla g 2       | 0 | V Der p 11        | 0 | Phl p 1    | 0 | Blank          | 0 |

| Donor no. NA4 |   |                   |   |            |   |                |      |
|---------------|---|-------------------|---|------------|---|----------------|------|
| Act d 1       | 0 | Bla g 5           | 0 | V Der p 14 | 0 | Phl p 2        | 0    |
| Act d 2       | 0 | Bla g 7           | 0 | V Der p 15 | 0 | Phl p 4        | 0    |
| Act d 5       | 0 | Blo t 5           | 0 | V Der p 18 | 0 | Phl p 5        | 0    |
| Act d 8       | 0 | Bos d 4           | 0 | V Der p 21 | 0 | Phl p 6        | 0    |
| Aln g 1       | 0 | V Bos d 4         | 0 | V Der p 23 | 0 | Phl p 7        | 0    |
| Alt a 1       | 0 | Bos d 5           | 0 | V clone 16 | 0 | Phl p 11       | 0    |
| Alt a 6       | 0 | V Bos d 5         | 0 | Equ c 1    | 0 | Phl p 12       | 0    |
| Amb a 1       | 0 | Bos d Lactoferrin | 0 | Equ c 3    | 0 | V Pis v 3      | 0    |
| V Ana o 1     | 0 | Bos d 8           | 0 | Fag e 2    | 0 | Pla a 1        | 0    |
| Ana o 2       | 0 | V Bos d 8         | 0 | Fel d 1    | 0 | Pla a 2        | 0    |
| V Ana o 2     | 0 | aS1-casein        | 0 | Fel d 2    | 0 | Pla a 3        | 0    |
| V nAna o 2    | 0 | aS2-casein        | 0 | Fel d 4    | 0 | Pla l 1        | 0    |
| V Ana o 3     | 0 | b-casein          | 0 | Gad c 1    | 0 | Pol d 5        | 0.34 |
| Ani s 1       | 0 | K-casein          | 0 | Gal d 1    | 0 | Pru p 1        | 0    |
| Ani s 3       | 0 | Transferrin       | 0 | Gal d 2    | 0 | Pru p 3        | 0    |
| Api g 1       | 0 | Bos d 6           | 0 | Gal d 3    | 0 | V Pru du 3     | 0    |
| Api m 1       | 0 | V BSA             | 0 | Gal d 5    | 0 | V Pru du 4     | 0    |
| V Api m 1     | 0 | Can f 1           | 0 | Gly m 4    | 0 | V Pru du 6     | 0    |
| V Api m 2     | 0 | Can f 2           | 0 | Gly m 5    | 0 | V Pru du 6.01  | 0    |
| Api m 4       | 0 | Can f 3           | 0 | Gly m 6    | 0 | V Pru du 6.02  | 0    |
| V Api m 4     | 0 | V Can f 4         | 0 | Hev b 1    | 0 | Sal k 1        | 0    |
| Ara h 1       | 0 | Can f 5           | 0 | Hev b 3    | 0 | Ses i 1        | 0    |
| V Ara h 1     | 0 | V Can f 5         | 0 | Hev b 5    | 0 | Tri a 14       | 0    |
| Ara h 2       | 0 | V Can f 6         | 0 | Hev b 6.01 | 0 | Tri a 19.0101  | 0    |
| Ara h 3       | 0 | Che a 1           | 0 | Hev b 8    | 0 | Tri a aA_T1    | 0    |
| V Ara h 3     | 0 | Cla h 8           | 0 | Jug r 1    | 0 | V Tri a 36 191 | 0    |
| Ara h 6       | 0 | Cor a 1.0401      | 0 | Jug r 2    | 0 | V Tri a 36     | 0    |
| V Ara h 6     | 0 | Cor a 8           | 0 | Jug r 3    | 0 | V m43          | 0    |
| Ara h 8       | 0 | Cor a 9           | 0 | Lep d 2    | 0 | V m82          | 0    |
| Ara h 9       | 0 | Cry j 1           | 0 | Mal d 1    | 0 | Serine         | 0    |
| Art v 1       | 0 | Cyn d 1           | 0 | Mer a 1    | 0 | Thioredoxin    | 0    |
| Art v 3       | 0 | Cup a 1           | 0 | Mus m 1    | 0 | Glutathione    | 0    |
| Asp f 1       | 0 | Der f 1           | 0 | MUXF3      | 0 | peroxiredoxin  | 0    |
| Asp f 3       | 0 | Der f 2           | 0 | Ole e 1    | 0 | Profilin       | 0    |
| Asp f 6       | 0 | Der p 1           | 0 | Ole e 7    | 0 | Dehydrin       | 0    |
| Ber e 1       | 0 | Der p 2           | 0 | Ole e 9    | 0 | purothionin    | 0    |
| Bet v 1       | 0 | V Der p 4         | 0 | Par j 2    | 0 | LTP            | 0    |
| Bet v 2       | 0 | V Der p 5         | 0 | Pen m 1    | 0 | V Ves v 1      | 0    |
| Bet v 4       | 0 | V Der p 7         | 0 | Pen m 2    | 0 | Ves v 5        | 0.8  |
| Bla g 1       | 0 | Der p 10          | 0 | Pen m 4    | 0 | V Ves v 5      | 0    |
| Bla g 2       | 0 | V Der p 11        | 0 | Phl p 1    | 0 | Blank          | 0    |

| Donor no. NA5 |   |                   |   |            |   |                |      |
|---------------|---|-------------------|---|------------|---|----------------|------|
| Act d 1       | 0 | Bla g 5           | 0 | V Der p 14 | 0 | Phl p 2        | 0    |
| Act d 2       | 0 | Bla g 7           | 0 | V Der p 15 | 0 | Phl p 4        | 0.27 |
| Act d 5       | 0 | Blo t 5           | 0 | V Der p 18 | 0 | Phl p 5        | 0    |
| Act d 8       | 0 | Bos d 4           | 0 | V Der p 21 | 0 | Phl p 6        | 0    |
| Aln g 1       | 0 | V Bos d 4         | 0 | V Der p 23 | 0 | Phl p 7        | 0    |
| Alt a 1       | 0 | Bos d 5           | 0 | V clone 16 | 0 | Phl p 11       | 0    |
| Alt a 6       | 0 | V Bos d 5         | 0 | Equ c 1    | 0 | Phl p 12       | 0    |
| Amb a 1       | 0 | Bos d Lactoferrin | 0 | Equ c 3    | 0 | V Pis v 3      | 0    |
| V Ana o 1     | 0 | Bos d 8           | 0 | Fag e 2    | 0 | Pla a 1        | 0    |
| Ana o 2       | 0 | V Bos d 8         | 0 | Fel d 1    | 0 | Pla a 2        | 0    |
| V Ana o 2     | 0 | aS1-casein        | 0 | Fel d 2    | 0 | Pla a 3        | 0    |
| V nAna o 2    | 0 | aS2-casein        | 0 | Fel d 4    | 0 | Pla l 1        | 0    |
| V Ana o 3     | 0 | b-casein          | 0 | Gad c 1    | 0 | Pol d 5        | 0    |
| Ani s 1       | 0 | K-casein          | 0 | Gal d 1    | 0 | Pru p 1        | 0    |
| Ani s 3       | 0 | Transferrin       | 0 | Gal d 2    | 0 | Pru p 3        | 0    |
| Api g 1       | 0 | Bos d 6           | 0 | Gal d 3    | 0 | V Pru du 3     | 0    |
| Api m 1       | 0 | V BSA             | 0 | Gal d 5    | 0 | V Pru du 4     | 0    |
| V Api m 1     | 0 | Can f 1           | 0 | Gly m 4    | 0 | V Pru du 6     | 0    |
| V Api m 2     | 0 | Can f 2           | 0 | Gly m 5    | 0 | V Pru du 6.01  | 0    |
| Api m 4       | 0 | Can f 3           | 0 | Gly m 6    | 0 | V Pru du 6.02  | 0    |
| V Api m 4     | 0 | V Can f 4         | 0 | Hev b 1    | 0 | Sal k 1        | 0    |
| Ara h 1       | 0 | Can f 5           | 0 | Hev b 3    | 0 | Ses i 1        | 0    |
| V Ara h 1     | 0 | V Can f 5         | 0 | Hev b 5    | 0 | Tri a 14       | 0    |
| Ara h 2       | 0 | V Can f 6         | 0 | Hev b 6.01 | 0 | Tri a 19.0101  | 0    |
| Ara h 3       | 0 | Che a 1           | 0 | Hev b 8    | 0 | Tri a aA_TI    | 0    |
| V Ara h 3     | 0 | Cla h 8           | 0 | Jug r 1    | 0 | V Tri a 36 191 | 0    |
| Ara h 6       | 0 | Cor a 1.0401      | 0 | Jug r 2    | 0 | V Tri a 36     | 0    |
| V Ara h 6     | 0 | Cor a 8           | 0 | Jug r 3    | 0 | V m43          | 0    |
| Ara h 8       | 0 | Cor a 9           | 0 | Lep d 2    | 0 | V m82          | 0    |
| Ara h 9       | 0 | Cry j 1           | 0 | Mal d 1    | 0 | Serine         | 0    |
| Art v 1       | 0 | Cyn d 1           | 0 | Mer a 1    | 0 | Thioredoxin    | 0    |
| Art v 3       | 0 | Cup a 1           | 0 | Mus m 1    | 0 | Glutathione    | 0    |
| Asp f 1       | 0 | Der f 1           | 0 | MUXF3      | 0 | peroxiredoxin  | 0    |
| Asp f 3       | 0 | Der f 2           | 0 | Ole e 1    | 0 | Profilin       | 0    |
| Asp f 6       | 0 | Der p 1           | 0 | Ole e 7    | 0 | Dehydrin       | 0    |
| Ber e 1       | 0 | Der p 2           | 0 | Ole e 9    | 0 | purothionin    | 0    |
| Bet v 1       | 0 | V Der p 4         | 0 | Par j 2    | 0 | LTP            | 0    |
| Bet v 2       | 0 | V Der p 5         | 0 | Pen m 1    | 0 | V Ves v 1      | 0    |
| Bet v 4       | 0 | V Der p 7         | 0 | Pen m 2    | 0 | Ves v 5        | 0    |
| Bla g 1       | 0 | Der p 10          | 0 | Pen m 4    | 0 | V Ves v 5      | 0    |
| Bla g 2       | 0 | V Der p 11        | 0 | Phl p 1    | 0 | Blank          | 0    |
