# Supplementary material for: A hypoallergenic peptide mix containing T cell epitopes of the clinically relevant house dust mite allergens
Source: PubMed Central journal article supplement (PMC7078969; doi:10.1111/all.13956), 2019-10-03
Supplement: ALL-74-2461-s007.pdf [file ALL-74-2461-s007.pdf]

Table S5. Percentages of HDM-sensitized and non-sensitized subjects showing positive IgG binding to allergens or peptides

|                 | <b>Sensitized</b> | <b>Non-HDM sensitized</b> |
|-----------------|-------------------|---------------------------|
| <b>Der p 1</b>  | 100.0             | 90.0                      |
| P1              | 0.0               | 0.0                       |
| P2              | 30.4              | 20.0                      |
| P3              | 4.3               | 10.0                      |
| P4              | 4.3               | 20.0                      |
| P5              | 17.4              | 10.0                      |
| P6              | 0.0               | 0.0                       |
| P7              | 0.0               | 0.0                       |
| P8              | 21.7              | 0.0                       |
| <b>Der p 2</b>  | 61.9              | 10.0                      |
| P1              | 14.3              | 20.0                      |
| P2              | 9.5               | 0.0                       |
| P3              | 9.5               | 0.0                       |
| P4              | 0.0               | 0.0                       |
| P5              | 4.8               | 0.0                       |
| <b>Der p 5</b>  | 92.9              | 40.0                      |
| P1              | 42.9              | 20.0                      |
| P2              | 0.0               | 0.0                       |
| P3              | 0.0               | 0.0                       |
| P4              | 28.6              | 10.0                      |
| <b>Der p 7</b>  | 100.0             | 60.0                      |
| P1              | 42.9              | 20.0                      |
| P2              | 57.1              | 20.0                      |
| P3              | 57.1              | 50.0                      |
| P4              | 28.6              | 20.0                      |
| P5              | 0.0               | 0.0                       |
| P5-6            | 0.0               | 0.0                       |
| P6              | 0.0               | 10.0                      |
| <b>Der p 21</b> | 100.0             | 60.0                      |
| P1              | 15.4              | 20.0                      |
| P2              | 15.4              | 30.0                      |
| P3              | 7.7               | 10.0                      |
| P4              | 15.4              | 10.0                      |
| <b>Der p 23</b> | 100.0             | 70.0                      |
| P1              | 11.1              | 30.0                      |
| P2              | 27.8              | 20.0                      |
| P3              | 66.7              | 30.0                      |
| P4              | 22.2              | 10.0                      |
| P5              | 22.2              | 20.0                      |
